1 **TITLE**

2 Patterns of Structural Variation Define Prostate Cancer Across Disease States

3 **AUTHORS/AFFILIATIONS**

4 Meng Zhou<sup>1,2,9</sup>, Minjeong Ko<sup>4,9</sup>, Anna C. Hoge<sup>4</sup>, Kelsey Luu<sup>4</sup>, Yuzhen Liu<sup>4</sup>, Magdalena L. Russell<sup>4</sup>,  
5 William W. Hannon<sup>4</sup>, Zhenwei Zhang<sup>1,5</sup>, Jian Carrot-Zhang<sup>1,2,3</sup>, Rameen Beroukhi<sup>1,2</sup>, Eliezer M.  
6 Van Allen<sup>1,2,6</sup>, Atish D. Choudhury<sup>1,3</sup>, Peter S. Nelson<sup>4,7</sup>, Matthew L. Freedman<sup>1,3,8</sup>, Mary-Ellen  
7 Taplin<sup>1,3,\*</sup>, Matthew Meyerson<sup>1,2,3,\*</sup>, Srinivas R. Viswanathan<sup>1,2,3,\*</sup>, Gavin Ha<sup>4,7,10,\*</sup>

8

9 <sup>1</sup> Department of Medical Oncology, Dana-Farber Cancer Institute, 450 Brookline Ave, Boston, MA 02215

10 <sup>2</sup> Broad Institute of MIT and Harvard, 415 Main Street, Cambridge, MA 02142

11 <sup>3</sup> Harvard Medical School, 25 Shattuck St, Boston, MA 02115

12 <sup>4</sup> Public Health Sciences and Human Biology Divisions, Fred Hutchinson Cancer Research Center, 1100  
13 Fairview Ave. N, Seattle, WA 98109

14 <sup>5</sup> Department of Pathology, UMass Memorial Medical Center, 1 Innovation Dr. #2, Worcester, MA 01605

15 <sup>6</sup> Center for Cancer Genomics, Dana-Farber Cancer Institute, 450 Brookline Ave, Boston, MA 02215

16 <sup>7</sup> Department of Genome Sciences, University of Washington, 1959 Pacific St, Seattle, WA, 98195

17 <sup>8</sup> Center for Functional Cancer Epigenetics, Dana-Farber Cancer Institute, 450 Brookline Ave, Boston, MA  
18 02215

19 <sup>9</sup> These authors contributed equally

20 <sup>10</sup> Lead Contact

21 \* Correspondence: [mtaplin@partners.org](mailto:mtaplin@partners.org) (M-E.T.), [matthew\\_meyerson@dfci.harvard.edu](mailto:matthew_meyerson@dfci.harvard.edu) (M.M.),  
22 [srinivas\\_viswanathan@dfci.harvard.edu](mailto:srinivas_viswanathan@dfci.harvard.edu) (S.R.V.), [gha@fredhutch.org](mailto:gha@fredhutch.org) (G.H.)

23

24 **KEYWORDS**

25 Prostate cancer; castration-resistant prostate cancer; androgen receptor; whole genome  
26 sequencing; structural variant; enhancer

27 **SUMMARY**

28 The complex genomic landscape of prostate cancer evolves across disease states under  
29 therapeutic pressure directed toward inhibiting androgen receptor (*AR*) signaling. While  
30 significantly altered genes in prostate cancer have been extensively defined, there have been  
31 fewer systematic analyses of how structural variation reflects the genomic landscape of this  
32 disease. We comprehensively characterized structural alterations across 278 localized and 143  
33 metastatic prostate cancers profiled by whole genome and transcriptome sequencing. We  
34 observed distinct significantly recurrent breakpoints in localized and metastatic castration-  
35 resistant prostate cancers (mCRPC), with pervasive alterations in noncoding regions flanking the  
36 *AR*, *MYC*, *FOXA1*, and *LSAMP* genes in mCRPC. We defined nine subclasses of mCRPC based  
37 on signatures of structural variation, each associated with distinct genetic features and clinical  
38 outcomes. Our results comprehensively define patterns of structural variation in prostate cancer  
39 and identify clinically actionable subgroups based on whole genome profiling.

## 40 INTRODUCTION

41 Over the past decade, genomic sequencing studies have progressively sharpened our view of  
42 the genetic landscape of prostate cancer (Leinonen et al., 2011). Such studies have defined key  
43 driver genes in prostate cancer and have enabled the deployment of therapeutic agents in  
44 molecularly-defined disease subsets, including potent androgen receptor (*AR*)-targeted therapies  
45 (de Bono et al., 2011; Scher et al., 2012), poly (ADP-ribose) polymerase (PARP) inhibitors in  
46 *BRCA1/2*-altered prostate cancers, and immune checkpoint inhibitors in cancers with  
47 microsatellite instability (Abida et al., 2019, 2020; de Bono et al., 2020; Pritchard et al., 2016).

48 To date, most cancer genomic studies have employed whole exome sequencing (WES) and have  
49 thus been focused on mutations or copy number alterations that occur within the protein-coding  
50 regions of genes, which represent only 1-2% of the genome. More recent studies applying whole  
51 genome sequencing (WGS) to prostate and other cancers have identified previously  
52 underappreciated recurrent alterations in regulatory (non-coding) regions of the genome and have  
53 illuminated complex mechanisms of genomic alterations – driven by structural variants (SVs) –  
54 that are difficult to discern by WES (Baca et al., 2013; Campbell et al., 2020; van Dessel et al.,  
55 2019; Fraser et al., 2021; Glodzik et al., 2017; Hadi et al., 2020; Nik-Zainal et al., 2016; Quigley  
56 et al., 2018; Stephens et al., 2011; Viswanathan et al., 2018; Weinhold et al., 2014). These studies  
57 highlight the need for continued high-resolution genomic discovery efforts in prostate cancer.

58 In addition to efforts characterizing entire cancer genomes, recent studies have illustrated the  
59 importance of molecularly profiling prostate cancer across disease states. While many localized  
60 prostate cancers can be cured with surgery or radiotherapy, a substantial portion of higher-risk  
61 cancers recur and progress to metastatic disease, which is incurable. Recurrent prostate cancer  
62 may have a long natural history, during which time a patient may receive several lines of therapy  
63 – with androgen deprivation therapy (ADT) as a backbone – that may shape the cancer's genomic  
64 landscape (Mateo et al., 2020).

65 Indeed, while hormone-refractory castration-resistant prostate cancer (CRPC) has been less  
66 extensively profiled than localized prostate cancer, several studies have indicated that CRPCs  
67 display genomic landscapes distinct from treatment-naïve disease (Armenia et al., 2018; Grasso  
68 et al., 2012). A cardinal hallmark of CRPC is the reactivation of *AR* signaling in the face of maximal  
69 ADT (Chen et al., 2004; Yuan et al., 2014). This may occur via diverse mechanisms, including  
70 the production of constitutively active *AR* splice variants (*AR-Vs*) and activating mutations or copy  
71 number amplifications of the *AR* gene (Brand and Dehm, 2013; Céraline et al., 2004; Henzler et  
72 al., 2016) or of regulatory elements distal to the gene body (Quigley et al., 2018; Takeda et al.,  
73 2018; Viswanathan et al., 2018). To date, the relative contribution of each of these mechanisms  
74 in driving *AR* reactivation in CRPC has not been systematically explored. Also needed is a more  
75 global map of significant hotspots of structural variation in prostate cancer genomes, drawn within  
76 a rigorous statistical framework.

77 In this study, we performed linked-read WGS on 36 mCRPC tumor-normal pairs. We combined  
78 these data with WGS and whole transcriptome sequencing (RNA-Seq) data from previously  
79 described localized and metastatic CRPC cohorts (Campbell et al., 2020; Li et al., 2020; Quigley  
80 et al., 2018; Viswanathan et al., 2018). We then established a harmonized workflow for the  
81 integrative genomic analysis of 278 localized and 143 metastatic CRPC samples, interrogated  
82 both hotspots and genome-wide patterns of structural variation, and evaluated their  
83 consequences.

## 84 RESULTS

### 85 WGS analysis of localized and metastatic prostate cancer cohorts

86 We performed linked-read whole genome sequencing on 36 biopsy specimens from 33 mCRPC  
87 patients and matched blood normal controls. After quality control, 17 samples were excluded  
88 based on insufficient tumor purity and contamination (**Methods, Figure 1A, Table S1**). We re-  
89 analyzed a linked-read WGS dataset of 23 samples published previously (Viswanathan et al.,  
90 2018), resulting in a total of 42 linked-read WGS samples from 38 patients with mean coverage  
91 of 34X (range 21X - 54X) and 33X (range 25X - 45X) for tumor and normal samples, respectively  
92 (**Table S1A**). The mean molecule length was 29 kB and 34 kB in tumor and normal samples,  
93 respectively (**Table S1A**).

94 We further combined these data with 101 mCRPC samples sequenced with standard short-read  
95 sequencing, published previously (Quigley et al., 2018). This resulted in the generation of a final  
96 combined cohort of 143 tumor-normal pairs (**Figure 1A**). Fifty-four samples (37.8% of 143  
97 samples) were collected at castration resistance, prior to receiving treatment of second-  
98 generation androgen receptor signaling inhibitor (ARSi) such as abiraterone and/or enzalutamide  
99 (“pre-treatment”), while the remaining 89 samples (62.2% of 143 samples) were collected at  
100 progression (“post-treatment”, **Figure 1B, Table S1B**). We analyzed the somatic single nucleotide  
101 variant (SNVs), insertion-deletions (indels), copy number alterations (CNAs), and SVs in the  
102 combined cohort and identified recurrent somatic alterations in each of these classes (**Figure 1A,**  
103 **Methods**).

104 A total of 2,315,452 SNVs and indels were called, with a mean tumor mutation burden (TMB) of  
105 2.82 mutations per million bases (Mb). We confirmed that known driver genes of prostate cancer  
106 were enriched for non-synonymous mutations, including *TP53*, *RB1*, *PTEN*, *FOXA1*, *CDK12*, *AR*  
107 and *SPOP* among known COSMIC Cancer Gene Census genes (dnscv,  $q \leq 0.1$ , **Table S1C and**  
108 **S1D, Methods**). We detected an average of 272 (range 96-833) SV events per sample. Based  
109 on breakpoint orientations, SV events were classified into deletions, inversions, tandem  
110 duplications, inter-chromosomal translocations, and intra-chromosomal translocations, while  
111 intra-chromosomal translocations were further divided into balanced and unbalanced events  
112 based on copy number information (**Methods**). Chromoplexy was detected in 53 samples (37.1%  
113 of 143 samples) while chromothripsis was detected in 37 samples (25.9%); these events were  
114 not mutually exclusive (Fisher’s exact test, log-odds=1.417, p-value=0.612). Ten cases (7.0%)  
115 harbored a genome-wide tandem duplicator phenotype (TDP), all of which had *CDK12*  
116 inactivating alterations, as recently reported (Viswanathan et al., 2018; Wu et al., 2018). We found  
117 that TDP was mutually exclusive with ETS rearrangements (Fisher’s exact test, log-odds  
118 ratio=0.133, p=0.043) and chromothripsis (log-odds ratio=0.301, p-value=0.007), as previously  
119 reported (van Dessel et al., 2019; Quigley et al., 2018; Viswanathan et al., 2018; Wu et al., 2018).

120 Analysis of CNA events across the genome revealed amplification and deletion peaks in the  
121 regions of known prostate cancer genes (Armenia et al., 2018; van Dessel et al., 2019; Quigley  
122 et al., 2018; Viswanathan et al., 2018). Many oncogenic drivers of mCRPC, such as *AR* and *MYC*,  
123 are within peaks of amplification across the cohort, while tumor suppressors such as *PTEN*, *TP53*,  
124 and *KMT2C* were found within deletion peaks (**Figure S1C, Table S1E and S1F**).

### 125 Recurrent somatic structural variants in prostate cancer-associated genes

126 Structural variants may either activate or inactivate gene function, depending on the location of  
127 the breakpoints and the specific class of SV. We analyzed the impact of SVs across our cohort,  
128 distinguishing between those with predicted inactivating (“gene transecting events”) and  
129 activating (“gene flanking events”) effects (**Figure 1C, Figure S1C, Table S1G and S1H**).

130 Frequent gene transecting alterations were observed at the *TTC28* (37.1% of 143 samples),  
131 *LSAMP* (31.5%), and *PTPRD* (23.8%) loci, which have not been extensively studied in prostate  
132 cancer. Rearrangements involving *TTC28* were predominantly inter-chromosomal translocations  
133 between the gene body and various non-recurrent partner loci (**Figure S2B**). This likely  
134 represents retrotransposon activity, given that the *TTC28* locus harbors an active L1  
135 retrotransposon element (Pitkänen et al., 2014; Pradhan et al., 2017; Tubio et al., 2014).  
136 Transecting SVs within the *LSAMP* and *PTPRD* genes were predominantly deletions. Both of  
137 these genes are sites of deletion/rearrangement in cancer and have been reported to function as  
138 tumor suppressors, though they have not been extensively studied within the context of prostate  
139 cancer (Chen et al., 2003; Kresse et al., 2009; Kühn et al., 2012; Veeriah et al., 2009) (**Figure**  
140 **1C**). Of note, although gene transecting events would be predicted to disrupt individual genes,  
141 the most frequent transecting events identified via this analysis were deletion events that span  
142 the adjacent *TMPRSS2* and *ERG* genes (observed in 37.8%), which actually produces an  
143 activating *TMPRSS2-ERG* fusion.

144 Duplication events that flank an intact gene could activate oncogenes, either by resulting in copy  
145 number gain of the gene or by duplicating non-coding regulatory regions (Quigley et al., 2018;  
146 Viswanathan et al., 2018). Indeed, we observed recurrent tandem duplication events with  
147 breakpoints located in the flanking gene regions of several known prostate cancer oncogenes,  
148 including *AR* (35.7%), *FOXA1* (16.8%), *MYC* (16.8%), and *CCND1* (14.0%) (**Figure 1C**).

149 Certain prostate cancer driver genes were altered by multiple classes of structural alterations in  
150 both the gene body and flanking regions (e.g., *AR*, *PTEN*), while others were predominantly  
151 altered by a single alteration class (e.g., SNVs for *TP53*, intragenic translocations for *TTC28*, or  
152 flanking tandem duplications for *MYC*) (**Figure 1C**, **Figure S1C**). Collectively, these results  
153 demonstrate that prostate cancer is associated with diverse classes of rearrangements, both  
154 within genes and in intergenic regions.

### 155 **Significantly recurrent breakpoint regions in the mCRPC genome are enriched within** 156 **enhancer regions and AR binding sites**

157 Next, we sought to identify significantly recurrent breakpoint (SRB) regions across our combined  
158 mCRPC cohort of 143 cases in a genome-wide, unbiased manner. We applied a Gamma-Poisson  
159 regression approach to model the occurrences of SV breakpoints within 100 kB windows across  
160 the cohort as previously described (Imielinski et al., 2017). Importantly, this model nominates  
161 significantly recurrent breakpoint regions likely to function as cancer drivers by accounting for six  
162 different covariates, including sequence features (e.g., GC-content and transposable elements),  
163 fragile sites, heterochromatin regions, DNase I hypersensitivity sites (DHS), and replication timing  
164 (**Methods**).

165 We identified a total of 55 significantly recurrent breakpoint regions genome-wide across our  
166 combined mCRPC cohort (Benjamini-Hochberg corrected, q-value  $\leq 0.1$ , **Figure 2A**, **Table S2A**).  
167 Thirty-six (65.5%) SRB regions were located within 1 Mb of 14 known prostate cancer driver  
168 genes, including *AR* and its enhancer, *TMPRSS2/ERG*, *TP53*, *PTEN*, *FOXA1*, and *MYC*. For  
169 these 14 driver genes, we did not observe significant differences in SV alteration frequencies  
170 when comparing between pre-treatment (N=54) and post-progression (N=89) samples, except in  
171 the case of *ERG*, for which the SV frequency was enriched in pre-treatment samples (Fisher's  
172 exact test,  $p = 0.0395$ ; all other genes had  $p > 0.05$ , **Figure S3B**). We also did not identify any  
173 major differences in the alteration frequencies of prostate cancer genes in four patients who had  
174 paired samples collected both before treatment with and after progression on an ARSi. (**Figure**  
175 **S3A**).



176 We then sought to compare how SVs drive prostate cancer across disease states. For the  
177 localized disease state, we utilized genome alteration calls from 278 primary localized prostate  
178 cancer tumors from the PCAWG study (Campbell et al., 2020; Li et al., 2020). Using Gamma-  
179 Poisson regression, we first identified 47 SRB regions in localized prostate cancer tumors (**Figure**  
180 **S2A, Table S2B**). Six prostate cancer genes (*TMPRSS2*, *ERG*, *TP53*, *PTEN*, *IL6ST*, *ELK4*) within  
181 mCRPC SRB regions were also found within or in proximity (less than 1 Mb) to an SRB region in  
182 localized disease. By contrast, four SRBs (three near *SEL1L3* and one near *PRKDC*) were unique  
183 to localized disease, while 27 SRBs were unique to mCRPC with six genes nearby (*LSAMP*,  
184 *ETV1*, *MYC*, *PTPRD*, *FOXA1*, *AR*). When comparing SV alteration frequencies for the 14 genes  
185 located within SRB regions in either mCRPC or localized tumors, 12 genes were significantly  
186 more altered in mCRPC samples, while *TMPRSS2* and *ERG* were significantly more altered in  
187 localized disease (Fisher's exact test,  $p < 0.05$  for all genes, **Figure 2B**). Thus, localized prostate  
188 cancer and mCRPC have significantly different landscapes of recurrent SVs.

189 To explore the potential functional consequences of SVs in intergenic SRB regions, we  
190 overlapped SV breakpoints with locations of H3K27ac marks specific to mCRPC (Pomerantz et  
191 al., 2020). We observed that intergenic SVs within SRB regions in the mCRPC cohort included  
192 gene flanking events that were enriched at putative enhancer regions for *AR*, *MYC*, and *FOXA1*,  
193 which all had frequent focal duplication events at sites marked by mCRPC-specific H3K27ac  
194 deposition (**Figure 2C**). Interestingly, an intragenic deletion SRB region was observed near the  
195 transcription start site of *LSAMP*, also overlapping H3K27ac marks. *PTEN* had a high level of  
196 both gene transecting and flanking deletions, leading to SV breakpoints that were spread more  
197 broadly around the gene.

198 We also observed an enrichment of metastatic-specific *AR* binding sites (ARBS) compared to  
199 localized primary ARBS within the 55 mCRPC SRB regions (**Figure 2D**, one-sided proportion test,  
200  $p = 1.05 \times 10^{-8}$ ). This enrichment was not observed for localized primary SRB regions ( $p = 0.22$ ).  
201 These results highlight that SVs within mCRPC SRB regions may be capturing the genome-wide  
202 footprint of activated *AR* signaling that occurs with castration resistance.

## 203 **Refined landscape of ETS gene fusions from integrated analysis of the genome and** 204 **transcriptome**

205 We applied gene fusion analysis by integrating both genome rearrangements and fusion RNA  
206 transcript information from 127 samples with RNA-seq data (**Figure 1A, Table S2C, Methods**).  
207 For gene fusions involving E26 transformation-specific (ETS) transcription factor gene family  
208 members (*ERG*, *ETV1*, *ETV4* and *ETV5*), we detected 50 events supported by both DNA and  
209 RNA evidence, 15 supported by only DNA evidence, and 10 supported by only RNA evidence  
210 (**Figure 2E, Figure S2D**). Overall, 74 samples (51.7% of 143 samples) harbored a fusion event  
211 of the *ETS* gene family, consistent with previous reports (Tomlins et al., 2005, 2007) (**Figure 1B,**  
212 **Table S2C**).

213 Among the ETS fusions, *ERG* was most commonly involved with *TMPRSS2* as the fusion partner  
214 (54 out of 57 cases, **Figure 2G**). Other common ETS fusion partners were *SLC45A3* (7 cases)  
215 and lncRNA RP11-356O9.1 downstream of *FOXA1* (3 cases). *ETV1* had eight distinct fusion  
216 partners, which is consistent with previous reports that *ETV1* is a promiscuous ETS fusion  
217 member (Kumar-Sinha et al., 2015) (**Figure 2F**).

218 We observed that fusions of the ETS family members *ERG*, *ETV1*, *ETV4* and *ETV5* were mutually  
219 exclusive, except for one sample which harbored fusions of both *ERG* and *ETV1* (**Figure S2D**).  
220 In addition, gene fusion events were correlated with higher expression of the corresponding ETS  
221 genes they involved (Wilcoxon rank-sum tests,  $p < 0.05$  for all genes, **Figure 2E**). In the 38 cases  
222 which did not show any evidence for an ETS fusion, we noted that presence of high-level

223 expression (z-score > 1) of ETS genes *ERG*, *ETV1*, *ETV4*, and *ETV5* were also mutually  
224 exclusive (Fisher's exact test,  $p = 0.480$  for *ETV4*,  $p = 0.363$  for *ETV5*, **Figure S2D**). These may  
225 represent cases of missed fusion calls, or cases in which ETS family members are  
226 transcriptionally activated through non-genetic mechanisms.

227 Interestingly, we also observed 20 cases (14.0% of 143 cases) involving fusions between the ETS  
228 family member *ELK4* and its upstream gene *SLC45A3*. While the *ELK4* locus was an SRB in our  
229 analysis (**Figure 2A** and **Figure S2B**), manual inspection of individual samples revealed evidence  
230 for a genomic event capable of producing an *ELK4* fusion in only 1 out of 20 cases (**Figure S2D**  
231 **and data not shown**). In contrast, 19 other cases showed *ELK4* fusions on RNA-sequencing  
232 alone, consistent with a mechanism of cis-splicing or transcriptional read-through events that may  
233 perhaps be induced by local genomic alterations (Qin et al., 2017; Rickman et al., 2009; Zhang  
234 et al., 2012) (**Table S2C**). Importantly, although *ELK4* fusions were significantly correlated with  
235 higher expression of *ELK4* (Wilcoxon rank-sum test,  $p = 7.91 \times 10^{-5}$ , **Figure S2D**), these events  
236 were not mutually exclusive with fusions of other ETS family members (Fisher's exact test,  $p =$   
237  $0.472$ ). Thus, the functional consequences of these *ELK4* fusions and whether they contribute to  
238 prostate cancer pathogenesis in a manner similar to other ETS fusions remains to be determined.

### 239 **Diverse and complex rearrangements driving AR signaling in mCRPC**

240 Genomic alterations involving the *AR* locus play an important role in sustaining *AR* signaling in  
241 mCRPC (Chen et al., 2004; Quigley et al., 2018; Visakorpi et al., 1995; Viswanathan et al., 2018).  
242 However, the complete spectrum of diverse structural mechanisms that underlie *AR* activation in  
243 mCRPC has not been fully characterized. To understand the relationship between different modes  
244 of somatic *AR* activation, we determined copy number at the *AR* gene body and its upstream  
245 enhancer and categorized samples into distinct groups of: **(1)** co-amplification (N = 99, 69.2% of  
246 143 cases); **(2)** selective *AR* gene body amplification (N = 4, 2.8% of 143 cases); **(3)** selective *AR*  
247 enhancer gains (N = 17, 11.9% of 143 cases), and **(4)** lack of amplification for both (N = 23, 16.0%  
248 of 143 cases) (**Figure 3A-C**, **Table S3**). For the 122 samples with expression data available, we  
249 observed that *AR* gene expression was higher in the co-amplification and selective enhancer  
250 categories compared to samples with no amplification, after accounting for tumor purity and ploidy  
251 (ANCOVA/TukeyHSD  $p$ -values  $5.6 \times 10^{-11}$  and  $4.5 \times 10^{-4}$ , respectively), but not for selective *AR*  
252 status (ANCOVA  $p = 0.098$ ) (**Figure 3B**, **Methods**). Interestingly, we observed that samples with  
253 selective enhancer duplication exhibited similar *AR* expression levels to samples with co-  
254 amplification (ANCOVA,  $p = 0.31$ ), even though enhancer duplications involved lower-copy gains  
255 (mean 2.73, range 1.97 - 5.02) compared to co-amplified samples (mean 12.87, range 1.55 -  
256 150.57) (**Figure 3A**). This is consistent with previous results (Viswanathan et al., 2018) and  
257 suggests a mechanism whereby *AR* expression levels are increased through even modest  
258 genomic expansion of enhancer elements.

259 We then systematically and manually curated the diverse mechanisms of rearrangements  
260 activating *AR* signaling by analyzing patterns of SVs at the *AR* locus (**Figure 3C**, **Table S3**,  
261 **Methods**). We observed a total of 62 samples (43.4% of 143 samples) with tandem duplication  
262 SV events that spanned the enhancer with breakpoints located within 1 Mb, including 16 cases  
263 (11.2% of 143 samples) with selective enhancer copy number amplification status (**Figure 3D**).  
264 Thirty-two samples (22.4% of 143 samples) harbored intragenic rearrangements within *AR*, which  
265 may have implications for the production of truncated, constitutively-active *AR* splice variants  
266 (Henzler et al., 2016). For example, in case DTB-124-BL, we observed a focal intragenic deletion  
267 spanning exons 4-8 of *AR*, which includes the ligand binding domain, resulting in the expression  
268 of truncated *AR* variants (Kanayama et al., 2021) (**Figure 3E**, **Figure S3C**). Interestingly, in the  
269 21 samples with selective *AR* enhancer or selective *AR* gene body copy number gain, none  
270 harbored intragenic SV events in *AR*.

271 We also examined the landscape of complex rearrangement mechanisms involving *AR*; these  
272 mechanisms involve multiple SV events and copy number patterns, including chromothripsis,  
273 extrachromosomal DNA (ecDNA), chromoplexy, and breakage-fusion-bridge cycle (BFB)  
274 (**Methods**). Chromothripsis of a region or the entire X chromosome involving the *AR* locus was  
275 detected in 5 samples, all of which had co-amplification of *AR* and enhancer, suggesting that  
276 following repair after catastrophic DNA shattering the *AR* locus was retained or further amplified  
277 (**Figure 3F, Figure 3G**). Thirteen samples (9.1% of 143 samples) showed very high levels of *AR*  
278 and enhancer copy number, suggesting the possibility of their presence on extrachromosomal  
279 elements (ecDNA, **Figure 3H**). In 40 samples (28.0% of 143 samples), the most frequent complex  
280 rearrangement mechanism, BFB, led to *AR* locus amplification, including instances following  
281 chromothripsis (Stephens et al., 2011; Umbreit et al., 2020) (**Figure 3G**). Overall, we noted that  
282 complex rearrangement events, which frequently co-occurred, were significantly enriched in  
283 samples with co-amplification of *AR* and enhancer compared to those with selective enhancer  
284 copy number gain status (Fisher's exact test,  $p = 1.52 \times 10^{-4}$ ).

### 285 **Distinct signatures of structural rearrangement patterns in mCRPC**

286 To systematically characterize genome-wide structural rearrangement patterns in mCRPC, we  
287 performed rearrangement signature analysis using SV breakpoint features, non-negative matrix  
288 factorization, and known reference signatures (Degasperi et al., 2020; Nik-Zainal et al., 2016)  
289 (**Methods**). First, we derived signatures *de novo*, which identified eight signatures: six that  
290 matched reference signatures (RefSigs) also observed in localized prostate cancer ( $> 0.91$  cosine  
291 similarity), one that matched an ovarian cancer RefSig.R14 associated with large segment (100  
292 kB-10 Mb) TDP (0.96 cosine similarity), and one that was likely an artifact specific to linked-read  
293 sequencing (**Figure S4A-C, Table S4A and 4B**). Therefore, we excluded the linked-read data  
294 and focused on standard WGS data from 101 mCRPC cases for further SV signature analysis.  
295 We fit these samples to the nine known RefSigs from localized prostate cancer (R1-4, R6a-b, R8-  
296 9, R15) and the one (R14) from ovarian cancer (**Figure S4A, Table S4C**). Overall, eight of the  
297 RefSigs were detected across our cohort (R1-2, R4, R6a-b, R9, R14-15). Notably absent in  
298 mCRPC were RefSig.R8 (short, 1-10 kB inversions) and RefSig.R3, which is associated with  
299 germline *BRCA1* mutations and short (1-100 kB) tandem duplications (Degasperi et al., 2020;  
300 Glodzik et al., 2017; Nik-Zainal et al., 2016; Willis et al., 2017) (**Figure S4D**). By contrast, we  
301 observed increased prevalence of some signatures in mCRPC compared to localized disease,  
302 including RefSig.R2 (large SV classes, abundant translocations; 97% vs. 60%), RefSig.R4  
303 (clustered translocation events; 37% vs. 27%), and RefSig.R15 (large deletions and inversions,  
304 48% vs. 37%) (**Figure S4D**).

305 To investigate whether molecular subtypes in mCRPC can be grouped based on SV patterns, we  
306 applied hierarchical clustering on the exposure of the eight fitted signatures and identified nine  
307 distinct SV clusters (**Figure 4, Table S4C**). We observed that samples in SV Cluster 1 were  
308 composed of non-clustered translocation events and were significantly enriched for the presence  
309 of chromoplexy ( $\chi^2$  test, FDR corrected,  $q = 0.12$ ). SV Cluster 3 was characterized by many short  
310 deletions and was significantly enriched for *BRCA2* mutations ( $q = 5.01 \times 10^{-4}$ ). SV Cluster 5 was  
311 significantly enriched for *SPOP* mutations ( $q = 0.02$ ), with no instances of ETS gene family fusion  
312 ( $q=0.06$ ), consistent with previous reports (Barbieri et al., 2012). SV Cluster 6 had the highest  
313 prevalence of *TP53* mutation ( $q = 0.02$ ), while SV Cluster 7 samples harbored the TDP associated  
314 with *CDK12* inactivation ( $q = 3.52 \times 10^{-11}$ ) as well as enrichment for *CCND1* gains ( $q = 0.02$ ),  
315 consistent with previous reports (Nguyen et al., 2020; Wu et al., 2018). The remaining clusters  
316 did not have enrichment for any alterations in known driver genes; however, distinct SV patterns  
317 were still evident in SV Cluster 4 (non-clustered tandem duplications), 8, and 9 (increased  
318 clustered SV events of various classes).

319 While SV Clusters 3, 5 and 6 had significant enrichment of mutations in *BRCA2*, *SPOP*, and *TP53*,  
320 respectively, not all samples within each cluster harbored these mutations. Intriguingly, we further  
321 noted that clinical outcomes showed significantly better stratification when using SV Clusters 3,  
322 5, and 6 for outcome stratification compared to using the associated mutation status itself (**Figure**  
323 **S4D-E**). Specifically, SV Cluster 5 had significantly better overall survival than SV Clusters 3 and  
324 6 (log-rank test,  $p=0.01$ ), while the sample group with *SPOP* mutations did not have significantly  
325 greater survival compared to the sample groups with *BRCA2* and *TP53* mutations (log-rank test,  
326  $p=0.45$ ) in this cohort. Together, these results indicate the analysis of genome-wide patterns of  
327 rearrangements may provide a way to further refine molecular subtypes in mCRPC.

## 328 **DISCUSSION**

329 We present a large-scale and comprehensive integrative genomic analysis of both localized  
330 prostate cancer and mCRPC, with a focus on how structural variation drives each of these  
331 clinically distinct disease states. The size of our cohort as well as our harmonized analysis pipeline  
332 enable a sharper view of the genetic alterations that drive prostate cancer across its natural history  
333 as compared with prior studies, which have involved either smaller cohorts or been limited to a  
334 single disease state (Campbell et al., 2020; Cancer Genome Atlas Research Network, 2015;  
335 Quigley et al., 2018; Viswanathan et al., 2018).

336 In contrast to somatic SNVs/indels and CNAs that occur within coding regions, the functional and  
337 clinical significance of alterations within noncoding regions has often been more challenging to  
338 interpret, as localized variations in mutability may result in the nomination of certain recurrently  
339 mutated sites that do not necessarily drive cancer (Glodzik et al., 2017; Imielinski et al., 2017;  
340 Nik-Zainal et al., 2016). This issue is even more complex for SVs, in which different classes of  
341 SVs spanning the same loci would be predicted to have distinct functional consequences. Our  
342 study addresses the former issue by identifying genomic hotspots of structural variation with  
343 rigorous correction for covariates including nucleotide composition, replication timing, sensitivity  
344 to DNA breaks, repetitive elements, and chromatin state. We address the latter issue by careful  
345 curation of SV classes to distinguish those that are likely to be activating versus inactivating  
346 (**Figures 1B and 3; Methods**).

347 Our approach has produced several insights into the recurrent rearrangements that drive prostate  
348 cancer. First, several top hotspots of rearrangement genome-wide lie in noncoding regions outside  
349 the boundaries of known prostate cancer genes. In many cases, such as for *AR*, *MYC*, and  
350 *FOXA1*, these hotspots overlap with active chromatin marks and likely represent distal regulatory  
351 regions for neighboring prostate cancer genes (**Figure 2**). These data are intriguing in light of the  
352 observation that a majority of prostate cancer germline susceptibility loci are in noncoding regions  
353 (Giambartolomei et al., 2021). Second, the loci altered by rearrangements differ across prostate  
354 cancer disease states (**Figure 2B**). For example, *TMPRSS2-ERG* rearrangements are enriched  
355 in localized prostate cancer versus mCRPC, while alterations in *AR*, *FOXA1*, *MYC*, and *LSAMP*  
356 are more frequent in mCRPC than in localized disease. Third, certain driver genes are enriched  
357 for alteration by SVs as compared to other mutagenic processes. For example, *PTEN* inactivation  
358 frequently occurs via gene transecting SV events, while *TP53* inactivation is primarily caused by  
359 SNVs (**Figure 1C and Figure S1**).

360 Our systematic genomic discovery efforts again highlight the primacy of *AR* as a target of somatic  
361 alteration in hormone-refractory mCRPC. We have precisely catalogued the diverse genomic  
362 mechanisms leading to *AR* activation across our large cohort and find that different alteration  
363 mechanisms are associated with differing levels of *AR* amplification. Whether the precise  
364 mechanism by which *AR* is altered in a given patient is associated with differences in response  
365 to *AR* pathway inhibition warrants further investigation in clinically annotated cohorts. High levels



366 of *AR* signaling in mCRPC may also underlie the patterns of structural variation seen in this  
367 disease state. Strikingly, we found that *AR* binding sites overlapped several of the top SV hotspots  
368 in mCRPC (**Figure 2D**), consistent with the notion that androgen signaling may induce DNA  
369 double-strand breaks that resolve as rearrangements (Haffner et al., 2010).

370 In addition to alterations in highly validated prostate cancer genes, we identified highly recurrent  
371 rearrangements near or involving genes that have not been extensively studied in prostate cancer,  
372 such as *LSAMP*, *PTPRD*, and *TTC28*. *LSAMP* encodes a cell-surface glycoprotein and has a  
373 possible tumor suppressor role in several cancers (Chen et al., 2003; Kresse et al., 2009; Kühn  
374 et al., 2012); notably, deletions near the *LSAMP* locus have been shown in one report to be  
375 enriched in African American men with prostate cancer (Petrovics et al., 2015). *PTPRD*, a  
376 receptor protein tyrosine kinase, has been previously identified as a target of inactivating  
377 alteration in glioblastoma (Veeriah et al., 2009). We observed frequent SVs near the *TTC28* locus,  
378 which encodes an L1 retrotransposon element, specifically in mCRPC (**Figure 1C**). L1  
379 retrotranspositions originating from *TTC28* have been reported previously in colorectal cancer  
380 (Pitkänen et al., 2014; Pradhan et al., 2017; Tubio et al., 2014); our results raise the intriguing  
381 possibility that they may also be frequent in prostate cancer, and may be activated by the pressure  
382 of hormonal therapy. Interestingly, we also observed SRBs near *ELK4* along with a relatively high  
383 frequency of *SLC45A3-ELK4* chimeric transcripts, although it was not clear how the  
384 rearrangements at this locus produced the chimeric transcripts in most cases. Whether this fusion  
385 functions similarly to or in a distinct mode from other ETS fusions is an exciting area for future  
386 study.

387 Our study also extends beyond the analysis of SVs at individual loci to molecularly subclassify  
388 prostate cancers based on their genome-wide signatures of structural variation. Sample clustering  
389 based on SV signature exposure defines distinct molecular subtypes of prostate cancer and may  
390 find utility alongside signatures of single base substitution and copy number to more precisely  
391 define tumor subtypes (Alexandrov et al., 2013, 2020; Degasperi et al., 2020; Macintyre et al.,  
392 2018; Wang et al., 2021). In the mCRPC cohort, we identified 9 molecular subtypes based on SV  
393 signature, and several clusters had clear associated genomic alterations including chromoplexy  
394 (cluster 1), *BRCA2* alterations (cluster 3), *SPOP* alterations (cluster 5), *TP53* alterations (cluster  
395 6) and *CDK12/CCND1* alterations (cluster 7). Future studies with larger WGS cohorts may identify  
396 associated alterations in the remaining clusters. Notably, unsupervised clustering identified  
397 samples with clear SV signatures but without detectable associated mutations in genes or  
398 pathways that plausibly contribute to the genomic alterations (**Figure 4**). Moreover, clinical  
399 outcomes were more separated by SV signature cluster than by alterations of the mutations  
400 associated with those clusters (**Figure S4D-E**).

401 In sum, these results highlight the dynamic complexity of rearrangements in prostate cancer  
402 across disease states and provide insights into new mechanisms of oncogenesis that can be  
403 functionally prioritized in future studies. More broadly, our work underscores the key role of large-  
404 scale WGS studies in the derivation of a comprehensive molecular taxonomy of prostate cancer.

## 405 **ACKNOWLEDGEMENTS**

406 We thank the many patients and their families for their generosity in contributing to this study. We  
407 also thank the Prostate Cancer Foundation (PCF) and Stand Up 2 Cancer (SU2C) International  
408 Prostate Cancer Dream Team for contributions to specimen acquisition.

409 This work was supported by the National Institutes of Health (K22 CA237746 to G.H.; P01  
410 CA163227 and R01 CA234715 to P.S.N.; R01 GM107427, R01 CA193910, and R01 CA251555  
411 to M.L.F.; R35 CA197568 to M.M.), Department of Defense Prostate Cancer Research Program  
412 (Physician Research Award W81XWH-17-1-0358 to S.R.V.; W81XWH-19-1-0565 and W81XWH-

413 21-1-0234 to M.L.F.; PC200262 to P.S.N.), PCF Young Investigator Awards (G.H. and S.R.V.),  
414 PCF-Movember Challenge Award (to E.M.V.), Brotman Baty Institute for Precision Medicine (to  
415 G.H.), the Fund for Innovation in Cancer Informatics Major Grant (to G.H.), the V Foundation  
416 Scholar Grant (to G.H.), Wong Family Award in Translational Oncology and Dana-Farber Cancer  
417 Institute Medical Oncology grant (to A.D.C.), H.L. Snyder Medical Research Foundation and the  
418 Cutler Family Fund for Prevention and Early Detection (to M.L.F.), and the Pan-Mass Challenge  
419 team IMAGINE (to M-E.T.), American Cancer Society Research Professor (M.M.).

420 This research was also supported in part by the NIH/NCI Cancer Center Support Grant P30  
421 CA015704, Pacific Northwest Prostate Cancer SPORE (P50 CA097186), and Scientific  
422 Computing Infrastructure (ORIP Grant S10OD028685).

## 423 **AUTHOR CONTRIBUTIONS**

424 **Conceptualization:** M-E.T, M.M., S.R.V., G.H.

425 **Methodology:** M.Z., M.K., S.R.V., G.H.

426 **Software:** M.Z., M.K., A.C.H., G.H.

427 **Formal Analysis:** M.Z., M.K., A.C.H., K.L., Y.L., M.R., W.H., J.C-Z, S.R.V., G.H.

428 **Data Curation:** M.Z., M.K., A.C.H., Z.Z., S.R.V., G.H.

429 **Writing – Original Draft:** M.Z., M.M., G.H., S.R.V.

430 **Writing – Review & Editing:** M.Z., R.B., E.M.V., A.D.C. P.S.N., M.L.F., M-E.T., M.M., G.H., S.R.V.

431 **Visualization:** M.Z., M.K., A.C.H., S.R.V., G.H.

432 **Supervision:** M-E.T., M.M., S.R.V., G.H.

433 **Funding Acquisition:** S.R.V., G.H., M.M.

## 434 **DECLARATION OF INTERESTS**

435 A.D.C.: Honoraria: OncLive, Bayer, Targeted Oncology, Aptitude Health, Journal of Clinical  
436 Pathways, Cancer Network; Consulting: Blackstone; Advisory Board: Clovis, Dendreon, Bayer,  
437 Eli Lilly, AstraZeneca, Astellas, Blue Earth; Research Funding: Bayer

438 E.M.V.: Advisory/Consulting: Tango Therapeutics, Genome Medical, Invitae, Enara Bio, Janssen,  
439 Manifold Bio, Monte Rosa; Research support: Novartis, BMS; Equity: Tango Therapeutics,  
440 Genome Medical, Syapse, Enara Bio, Manifold Bio, Microsoft, Monte Rosa; Travel reimbursement:  
441 Roche/Genentech; Patents: Institutional patents filed on chromatin mutations and immunotherapy  
442 response, and methods for clinical interpretation; intermittent legal consulting on patents for  
443 Foaley & Hoag

444 M-E.T.: Advisory boards: Janssen, Pfizer, Astra Zeneca, Bayer

445 M.L.F.: Served as a consultant to and has equity in Nuscan Diagnostics. This activity is outside  
446 of the scope of this manuscript.

447 M.M.: Consultant for Bayer, Interline and Isobl; an inventor of patents licensed to LabCorp and  
448 Bayer; and receives research funding from Bayer, Janssen, and Ono Pharmaceuticals.

449 P.S.N.: Served as a consultant to Bristol Myers Squibb, Janssen, and Pfizer in work unrelated to  
450 the present study.

- 451 S.R.V.: Consulting (current or previous 3 years), MPM Capital and Vida Ventures; spouse is an  
452 employee of and holds equity in Kojin Therapeutics.  
453 All other authors declare no competing interests.

## 454 MAIN FIGURE LEGENDS

### 455 Figure 1. Study design and genomic landscape of mCRPC.

456 **(A)** Workflow of study and data analysis. Tumor specimens (grey) from both primary prostate  
457 cancer and mCRPC were included in this study. Linked-read and short-read whole-genome  
458 sequencing (WGS) and RNA-sequencing datasets were either generated for this study or  
459 reanalyzed from prior studies (Quigley et al., 2018; Viswanathan et al., 2018). A pooled dataset  
460 of 143 mCRPC samples with WGS data was used in this study after curation (**Methods**). Genomic  
461 alteration call-sets for 278 primary localized prostate cancer samples were obtained from  
462 ICGC/TCGA Pan-Cancer Analysis of Whole Genomes (PCAWG) (Campbell et al., 2020; Li et al.,  
463 2020). For 125 mCRPC samples, RNA-seq was used. The overview of the genomic alteration  
464 and characterization analysis is shown.

465 **(B)** Clinical annotations and somatic alterations for 143 patient samples in the pooled mCRPC  
466 cohort. Samples are ordered by treatment type; the four patients with pre-treatment and post-  
467 progression pairs are placed at the right. (Top) Clinical and sample information and genomic  
468 pattern classifications. (Middle) Distribution of genomic rearrangement types in individual samples.  
469 (Bottom) Mutational burden for SNVs and indels computed as number of mutations per mega-  
470 base pair (Mb). Y-axis shown in logarithmic scale. Threshold lines indicates mutational burden at  
471 2.5 and 5 mutations per Mb.

472 **(C)** Genomic rearrangement alteration profiles of key mCRPC genes. (Top) Events were  
473 categorized into gene transecting and gene flanking events (**Methods**). Gene transecting: if any  
474 of its breakpoints was located within the gene body region. Gene flanking: rearrangements which  
475 were not gene transecting and had breakpoints located within 1 Mb of either transcription start  
476 site or termination site of the gene. Only 159 genes reported and known to be involved in prostate  
477 cancer were considered in this analysis (**Table S1G and S1H**). (Middle) Frequency and  
478 distribution of rearrangement types for gene transecting events; genes with  $\geq 10\%$  frequency are  
479 shown. Gene transecting events were prioritized over flanking events during annotation. The  
480 category “Multiple” represents gene-sample pairs carrying more than one type of rearrangement  
481 event. (Bottom) Frequency of gene flanking events by tandem duplication; genes with  $\geq 10\%$  are  
482 shown.

### 483 Figure 2. Genome-wide analysis of genomic rearrangements in mCRPC.

484 **(A)** Analysis of significantly recurrent breakpoint (SRB) identified regions of rearrangement  
485 hotspots, genome-wide, using a Gamma-Poisson regression model. Each dot corresponds to a  
486 100 kB bin ( $n=26,663$  total bins). Statistically significant SRB bins with FDR (Benjamini-Hochberg)  
487  $q$ -value  $\leq 0.1$  ( $n=55$ ) are colored based on the distance to the nearest known prostate cancer  
488 driver gene, within 1 Mb. The driver genes within 1 Mb of the SRB bins are labeled. A square  
489 bracket is used for genes spanning multiple bins. Bins with  $q$ -value  $> 0.1$  were not significant  
490 (grey).

491 **(B)** Comparison of SV alteration frequency in mCRPC versus primary localized prostate cancer.  
492 The union set of genes ( $n=14$ ) within 1 Mb of SRB hotspot regions in mCRPC and localized  
493 prostate cancer cohorts was included in the comparison. The frequencies represent total gene  
494 transecting and flanking SV events. All labeled genes were significantly enriched in either mCRPC  
495 or primary localized tumors (Fisher’s test,  $p$ -value  $< 0.05$ ).

496 **(C)** Patterns of rearrangements at the loci of driver genes identified at SRB regions in mCRPC  
497 cohort of 143 tumors. Cumulative counts of intra-chromosomal SV events (tandem duplications  
498 “TandemDup”, deletions, and inversions) were computed based on the breakpoints and span of  
499 the events. Histone H3 lysine 27 acetylation (H3K27ac) and *AR* binding sites (ARBS) specific to



500 mCRPC were obtained from a previous study (Pomerantz et al., 2020). Inter-chromosomal  
501 translocations are not shown. Genome coordinates based on hg38 build.

502 **(D)** Overlap of *AR* binding sites (ARBS) within SRB hotspots of mCRPC (55 regions) and primary  
503 localized prostate (47 regions) cohorts. Metastatic-specific and primary localized-specific ARBS  
504 were obtained from previous studies (Pomerantz et al., 2015, 2020).  $\chi^2$  test of independence p-  
505 values are shown.

506 **(E)** Fusion status and expression of selected genes in ETS transcription factor gene family in the  
507 mCRPC cohort with WGS and RNA-seq data. Fusion type was defined as the data evidence that  
508 supported the event: DNA-only, corresponds to WGS; RNA-only, corresponds to RNA-seq;  
509 DNA+RNA, corresponds to support from both WGS and RNA-seq. Each dot represents a tumor  
510 sample and is colored based on fusion type of each sample; grey indicates no evidence of fusion  
511 event. Data shown for samples with available expression data for the specific ETS gene. Gene  
512 expression values of full-length transcripts are z-score normalized.

513 **(F)** Fusion profile of *ETV1*. DNA rearrangement breakpoints supporting the fusion (purple bars)  
514 are indicated with the corresponding fusion partners. Exons of the ETS domain (red) are indicated.  
515 Genome coordinates based on hg38 build.

516 **(G)** Summary of fusion partners for selected genes in ETS transcription factor gene family in  
517 mCRPC cohort. Fusion events and partners are indicated by flow connections. Total counts of  
518 individual fusion events and partners across the cohort are shown.

### 519 **Figure 3. Modes of *AR* activation in mCRPC.**

520 **(A)** Copy number of *AR* gene and its enhancer (~624 kB upstream) for mCRPC cohort samples  
521 after adjustment by tumor purity and sample ploidy normalization. Data shown for samples with  
522 available *AR* gene expression data. (Left) Copy number of *AR* and its enhancer are shown in  $\log_2$   
523 scale, colored based on *AR* gene expression level (transcripts per million, TPM). (Right) Excerpt  
524 of figure highlighting *AR* expression for samples with lower copy number values.

525 **(B)** *AR* expression for *AR* locus copy number status for 122 samples with available *AR* gene  
526 expression data. ANCOVA test was performed to account for tumor purity and ploidy as  
527 covariates. TukeyHSD p-values for pair-wise comparisons between groups with *AR* locus  
528 amplification status and groups with no amplification.

529 **(C)** Patterns of rearrangements involving the *AR* locus in 143 mCRPC samples. Presence of  
530 specific alteration events and complex rearrangements (black) were predicted automatically and  
531 manually curated. *AR* gene expression shown (blue shades) for same samples in (B); samples  
532 with no available expression data are indicated in grey. Representative examples of each  
533 category are presented in (D) to (H).

534 **(D-H)** Complex and simple rearrangement patterns involving the *AR* locus, including focal  
535 duplication events on *AR* enhancer **(D)**, intragenic deletion event leading to loss of ligand binding  
536 domain of *AR* **(E)**, chromosomal level chromothripsis events involving *AR* and enhancer **(F)**, arm-  
537 level chromothripsis coinciding with *AR* amplification by break-fusion-break cycle **(G)**, extra-  
538 chromosomal DNA amplicon including *AR* and enhancer **(H)**. *AR* gene boundary (green) and its  
539 enhancer (yellow) are shown; concave arcs, intra-chromosomal SV events; convex arcs, inter-  
540 chromosomal SV events. Copy number values represent 10 kB bins and have been tumor purity  
541 corrected.

542 **Figure 4. Clustering of mCRPC SV signatures**

543 SV signature analysis and hierarchical clustering identifies nine distinct molecular groups. (Top)  
544 Dendrogram of the clustering of SV signature exposure. The prevalence of each signature was  
545 computed based on having  $\geq 0.05$  exposure (proportion of SVs). (Middle) Enrichment of altered  
546 prostate cancer drivers. Enriched alterations in Cluster 1, 3, 5, 6, and 7 are shown based on  
547 statistical significance by  $\chi^2$  test. (Bottom) Composition of SV types and sizes for each SV cluster,  
548 separated by non-clustered (nc) and clustered (c) SV events.

549

## 550 RESOURCE AVAILABILITY

### 551 Lead contact

552 Further information and requests for resources and reagents should be directed to and will be  
553 fulfilled by the lead contact, Gavin Ha (gha@fredhutch.org).

### 554 Materials availability

555 This study did not generate new unique reagents.

### 556 Data and code availability

- 557 • Whole genome sequencing data have been deposited at dbGaP under accession number  
558 phs001577 and access is available upon request.
- 559 • All original code has been deposited at GitHub and is publicly available as of the date of  
560 publication. Links are provided in the key resources table.
- 561 • Any additional information required to reanalyze the data reported in this paper is available  
562 from the lead contact upon request.

## 563 EXPERIMENTAL MODEL AND SUBJECT DETAILS

### 564 Human subjects

565 For tumor biopsies profiled via linked-read sequencing, samples were collected from individuals  
566 with mCRPC who provided informed consent on institutional IRB-reviewed protocols, as  
567 previously described (Viswanathan et al., 2018). Uniformly reanalyzed data were generated as  
568 described in the respective studies (Campbell et al., 2020; Quigley et al., 2018).

## 569 METHOD DETAILS

### 570 Sequence data processing for linked-read genome sequencing data

571 Data processing of the linked-read genome sequencing data include high molecular weight DNA  
572 preparation and sequencing library construction followed protocols as previously described  
573 (Viswanathan et al., 2018). DNA was extracted from tumor samples using the MagAttract HMW  
574 DNA Kit (QIAGEN), and then quantified using Quant-it Picogreen assay kit (Thermo Fisher) on a  
575 Varioskan Flash Microplate Reader (Thermo Fisher). For germline samples, pre-extracted DNA  
576 was size-selected on the PippinHT platform (Sage Science) and then quantified using the Quant-  
577 it Picogreen assay kit (Thermo Fisher) on a Varioskan Flash Microplate Reader (Thermo Fisher).  
578 Libraries were constructed using the 10X Chromium protocol (10X Genomics), with the fragment  
579 sizes determined using the DNA 1000 Kit and 2100 BioAnalyzer (Agilent Technologies) and  
580 quantified using qPCR (KAPA Library Quantification Kit, Kapa Biosystems). WGS libraries were  
581 sequenced using the Illumina HiSeqX platform. The Long Ranger v2.2.2 pipeline (10X Genomics)  
582 was used for aligning sequence reads to the human genome hg38 (GRCh38).

583 Samples were excluded from the analysis based on having tumor purity less than 15% estimated  
584 by TitanCNA or based on cross-individual contamination indicated by SNP fingerprinting. A total  
585 of 17 samples with linked-read data was excluded (**Table S1J**).

## 586 **QUANTIFICATION AND STATISTICAL ANALYSIS**

### 587 **List of known prostate cancer driver genes**

588 For analyses limited to established prostate cancer driver genes, a curated list of 159 known  
589 prostate cancer driver genes was assembled from several prior studies (Armenia et al., 2018; van  
590 Dessel et al., 2019; Quigley et al., 2018; Viswanathan et al., 2018). The list of genes are provided  
591 in **Table S1**.

### 592 **Somatic mutation analysis**

#### 593 *Somatic mutation detection*

594 Somatic mutation calls for samples based on linked-read sequencing were generated by Mutect2  
595 from the Genome Analysis Toolkit (GATK) (Van der Auwera and O'Connor, 2020). Default  
596 parameters were used on individual pairs of tumor and normal samples following the standard  
597 GATK pipeline. A panel of normals based on all normal samples was used to filter out germline  
598 variants. The SNV calls were further processed using the modified version of LoLoPicker (Carrot-  
599 Zhang and Majewski, 2017) as described previously (Viswanathan et al., 2018). The panel of  
600 normals for LoLoPicker was generated from 52 normal samples based on linked-read sequencing.  
601 The final SNV call set was composed of the common variants called by both Mutect2 and  
602 LoLoPicker. Somatic indels for linked-read samples were called by Strelka (Saunders et al., 2012).  
603 All parameters were default except the following modifications: sindelNoise = 0.000001,  
604 minTier1Mapq = 20. Somatic mutation calls for the 101 WGS samples based on short-read  
605 sequencing including SNV and indels based on Strelka were obtained from a prior study (Quigley  
606 et al., 2018). All variants were further annotated using annovar with "table\_annovar.pl" to  
607 functionally annotate genetic variants. The parameter -neargene was set to 5000 to define the  
608 promoter region as 5 kB upstream of the transcription start site of a protein coding gene.

#### 609 *Analysis of significantly mutated genes*

610 R package dndscv (Martincorena et al., 2017) was used to identify significantly mutated genes.  
611 For driver discovery on GRCh38, a precomputed database corresponding to human genome  
612 GRCh38.p12 was downloaded and used as the reference database. A global q-value  $\leq 0.1$  was  
613 applied to identify statistically significant (novel) driver genes. To reduce false positives and  
614 increase the signal to noise ratio, we only considered mutations in Cancer Gene Census genes  
615 (v81) (Tate et al., 2019).

### 616 **Copy-number analysis of linked-read WGS and short-read WGS data**

#### 617 *Copy-number calls*

618 The ploidy and purity corrected copy-number of all mCRPC samples in this study was analyzed  
619 by TitanCNA (Ha et al., 2014) and ichorCNA (Adalsteinsson et al., 2017), with different pipeline  
620 settings. For WCDT samples, the snakemake workflow for Illumina sequencing was applied with  
621 the following parameters modified: ichorCNA\_normal: c(0.25, 0.5, 0.75); ichorCNA\_ploidy:  
622 c(2,3,4); ichorCNA\_includeHOMD: TRUE; ichorCNA\_minMapScore: 0.75;  
623 ichorCNA\_maxFracGenomeSubclone: 0.5; ichorCNA\_maxFracCNASubclone: 0.7;  
624 TitanCNA\_maxNumClonalClusters: 3; TitanCNA\_maxPloidy: 4. The workflow is available at  
625 [https://github.com/GavinHaLab/TitanCNA\\_SV\\_WGS](https://github.com/GavinHaLab/TitanCNA_SV_WGS).

626 For linked-read data samples, a Snakemake workflow for 10X Genomics whole genome  
627 sequencing data was used with the following parameters modified:  
628 TitanCNA\_maxNumClonalClusters: 3; TitanCNA\_maxPloidy: 4. TitanCNA solutions were  
629 generated for number of clonal clusters from 1 to 3 and ploidy initializations from 2 to 4. Optimal



630 solutions were selected as described, with manual inspection to confirm tumor ploidy and clonal  
631 cluster selection (Viswanathan et al., 2018); solutions are provided in **Table S1J**. The workflow  
632 can be accessed at [https://github.com/GavinHaLab/TitanCNA\\_10X\\_snakemake](https://github.com/GavinHaLab/TitanCNA_10X_snakemake). The final copy-  
633 number call-set is included in **Table S1I**.

#### 634 *Recurrent somatic copy-number alteration*

635 GISTIC 2.0 was used to detect regions with recurrent CNA in mCRPC samples. For input, all copy  
636 numbers (logR\_Copy\_Number from TITAN output) were converted to log2 copy ratio using the  
637 median logR copy number from genome-wide (separately for autosomes and X chromosome) as  
638 denominator. We set corrected logR copy number to -1.5 for segments where corrected log R  
639 copy number below -1.5 and set values to 0 if copy neutral. GISTIC2.0 was run with the following  
640 parameters: td 0.5; ta 0.1; genegistic 0; maxseg 5000; js 4; cap 1.5; broad 1; brlen 0.75; conf 0.99;  
641 qvt 0.25; armpeel 1; rx 0; gcm mean; do\_gene\_gistic 1; savegene 1; scent median. Wide peaks  
642 detected by GISTIC2 were re-annotated based on overlapping genomic coordinates, using  
643 prostate cancer driver genes.

#### 644 **Structural variant analysis**

##### 645 *Structural variant detection in linked-read and short-read whole genome sequencing data*

646 For each tumor-normal pair of samples with linked-read genome sequencing data, three variant  
647 callers were used to detect structural variants: SvABA (Wala et al., 2018), GROC-SVS (Spies et  
648 al., 2017), Long Ranger version 2.2.2 ([https://support.10xgenomics.com/genome-  
649 exome/software/pipelines/latest/using/wgs](https://support.10xgenomics.com/genome-exome/software/pipelines/latest/using/wgs)).

650 The SvABA analysis was performed using default tumor-normal paired settings. Re-analysis of  
651 low confidence (based on evidence from discordant and split reads) events filtered by SvABA was  
652 performed to 'rescue' SVs using linked-read barcode overlap between pairs of breakpoints within  
653 a given SV event, as previously described (Viswanathan et al., 2018). Only SV events having  
654 span of 1.5 times the mean molecule length in the library were considered for rescue. We further  
655 rescued low confidence intra-chromosomal SV events with span > 50 kB filtered by SvABA if at  
656 least one of the breakpoint pair was within 100 kB of a CNA boundary or (2) if both breakpoints  
657 were each within 1 Mb of the boundaries for the overlapping CNA event and the length of the SV  
658 overlaps this CNA event by > 75%. Inter-chromosomal translocation SV events filtered by SvABA  
659 are rescued if both breakpoints were within 100 kB of CNA boundaries.

660 GROC-SVS analysis was performed using two-sample (tumor-normal paired) mode or three-  
661 sample (pre-treatment, post-progression, normal) mode when applicable. SV events were  
662 retained if all following conditions were satisfied: (1)  $p < 1 \times 10^{-10}$ , (2) minimum barcode overlap  $\geq$   
663 2 on the same haplotype, (3) no more than 1 barcode overlap between different haplotypes, (4)  
664 FILTER value reported by the software was within this set {"PASS", "NOLONGFRAGS",  
665 "NEARBYSNVS", or "NEARBYSNVS; NOLONGFRAGS"}, and (5) classified as somatic.

666 Long Ranger analysis generated SV calls for tumor and normal samples, independently. For each  
667 tumor-normal pair, both large SVs ("large\_sv\_calls.bedpe") and deletions ("dels.vcf") were  
668 combined for individual samples. Somatic tumor SVs were determined as events that were not  
669 found in the matched normal sample based on the left breakpoints in tumor and normal being  
670 within 1 kB and the right breakpoints in tumor and normal samples being within 1 kB. Only SV  
671 events with FILTER values within this set {"PASS", "LOCAL\_ASM", "SV", "CNV, SV"} and intra-  
672 chromosomal events with span  $\geq$  100 kB were considered. SV events were only retained if both  
673 breakpoints of an SV event were within 500 kB the boundaries of an overlapping CNA event and  
674 the length of SV overlaps this CNA event by > 75%.

675 SV events from these three callers were then combined by taking the union of the filtered events  
676 from. Intersecting events between 2 or more call-sets were determined if both breakpoints of one  
677 event were located within 5 kB from both breakpoints of the event detected by the other tool. Then  
678 the details of this event were retained based the priority ordered by SvABA, GROC-SVS, Long  
679 Ranger. Long Ranger SV events were further filtered out if they were not intersecting events  
680 detected by at least one other tool. SV events with span less than 1 kB were excluded from  
681 downstream analyses.

682 An SV panel of normals (PoN) was generated using germline events from SvABA and Long  
683 Ranger calls. There are two components to this panel: (1) frequency of germline events at exact  
684 breakpoint locations (SVpon.bkpt) and (2) frequency of germline event breakpoint overlapping  
685 within tiled windows of 1 kB (SVpon.blackListBins). The PoN was used to filter events in the  
686 combined SV call-set when an SV has at least one breakpoint with SVpon.bkpt  $\geq 2$  and  
687 overlapping bin with SVpon.blackListBins  $\geq 100$ .

688 The workflow for SV analysis from linked-read sequencing data can be accessed at  
689 [https://github.com/GavinHaLab/SV\\_10X\\_analysis](https://github.com/GavinHaLab/SV_10X_analysis). Manual curation of filtered SV events in the AR  
690 locus was performed and rescued events were labeled “Manual”. The final SV call-set is included  
691 in **Table S1K**.

692 For samples based on short-read WGS, SvABA was used in tumor-normal paired mode for SV  
693 detection with default parameters. Intra-chromosomal SV events with span  $> 1$  kB were retained.  
694 The SvABA workflow can be accessed at [https://github.com/GavinHaLab/TitanCNA\\_SV\\_WGS](https://github.com/GavinHaLab/TitanCNA_SV_WGS)

#### 695 *Classification of structural variants in mCRPC*

696 SV types were annotated based on orientations of breakpoints and bin-level copy-number around  
697 breakpoints. The orientation of one breakpoint was defined based on the fragment of DNA  
698 molecule being connected to the altered molecule. If the connected fragment was to the 5'-end of  
699 the breakpoint, *i.e.*, “upstream” or “left” to the breakpoint, then the orientation was annotated as  
700 forward or “+”; on the contrary, if the connected fragment was located to the 3'-end of the  
701 breakpoint, the orientation was annotated as reverse or “-”. The copy-number near each  
702 breakpoint was evaluated using 10 kB bins. For one SV event, copy-number values of the bins  
703 located to the upstream and downstream of breakpoint 1 were denoted as  $c_1^{up}$  and  $c_1^{down}$ ,  
704 respectively; similarly, the copy-number values for breakpoint 2 were denoted as  $c_2^{up}$  and  $c_2^{down}$ .  
705 In addition, then mean copy-number  $c^{mean}$  of the 10 kB bins between the two breakpoints of one  
706 SV event and the number of bins  $s$  were also considered during SV classification. Intra-  
707 chromosomal SV events, *i.e.*, both breakpoints were located on the same chromosome, were  
708 classified to the list of SV types below following the corresponding classification criteria.

- 709 • Deletion. Events having the orientation combination (reverse, forward) and length  
710 between 10 kB and 1 Mb were classified as deletions. The copy-number values of  
711 breakpoints should satisfy  $c_1^{up} > c_1^{down}$  or  $c_2^{up} < c_2^{down}$ , and  $c_1^{up} > c^{mean}$  or  $c_2^{down} > c^{mean}$ , and  
712  $s \leq 5$ . In addition, events overlapping copy-number deletion or LOH segments were also  
713 considered as deletions.
- 714 • Tandem duplication. Events having the orientation combination (forward, reverse) and  
715 length between 10 kB and 1 Mb were classified as tandem duplications. The copy-number  
716 values of breakpoints should satisfy  $c_1^{up} < c_1^{down}$  or  $c_2^{up} > c_2^{down}$ , and  $c_1^{up} < c^{mean}$  or  $c_2^{down} <$   
717  $c^{mean}$ , and  $s \leq 5$ . In addition, events overlapping copy-number gain or copy neutral LOH  
718 segments were also considered as tandem duplications.
- 719 • Inversion. Events having the orientation combination (forward, forward) or (reverse,  
720 reverse) and length between 10 kB and 5 Mb were classified as inversions. Furthermore,  
721 inversion events shorter than 30 kB with unequal copy-numbers around either breakpoint  
722 were classified as fold-back inversions.

- 723
- 724
- 725
- 726
- 727
- 728
- 729
- 730
- 731
- Balanced rearrangement (balanced). Events having the orientation combination same to inversion (forward, forward) or (reverse, reverse), but length larger than 5 Mb were classified as balanced events. The copy-number values of breakpoints should satisfy  $c_1^{up} = c_1^{down}$  and  $c_2^{up} = c_2^{down}$ , or  $c_1^{up} = c^{mean}$  and  $c_2^{down} = c^{mean}$ .
  - Unbalanced rearrangement (unbalanced). Intra-chromosomal events which did not fulfill any of the above criteria and having length larger than 10 kB were classified as unbalanced events.
  - All SV events with two breakpoints located on different chromosomes were classified as translocations.

### 732 *ICGC/TCGA PCAWG localized prostate cancer structural variants*

733 We obtained localized prostate cancer structural variation calls from ICGC Data Portal release 28  
734 ([https://dcc.icgc.org/releases/PCAWG/consensus\\_sv](https://dcc.icgc.org/releases/PCAWG/consensus_sv)). In this consensus SV file, each SV event  
735 was predicted by at least two variant callers. Samples that were classified as prostate  
736 adenocarcinoma (PRAD) and early onset prostate cancer (EOPC) were selected. A total of 278  
737 samples successfully lifted over to genome build GRCh38. To maximize consistency with mCRPC  
738 datasets, we used only the PCAWG consensus SVs that included “SNOWMAN” as one of the  
739 tools. Note that “SNOWMAN” was the previous name for SvABA. Intrachromosomal SV events  
740 shorter than 10 kB were excluded.

### 741 **Tandem duplicator phenotype**

742 For all samples in the combined cohort, the TDP status was predicted using copy-number and  
743 SV by counting the number of copy-number segments overlapping with tandem duplication SV  
744 events, *i.e.*, gain segments. A sample was considered as TDP if it has more than 300, or 90 gain  
745 segments for samples based on linked-read sequencing and short-read sequencing, respectively.  
746 The number of segments with gain and median length SV are reported in **Table S1L**.

### 747 **Chromothripsis analysis**

748 Chromothripsis events were detected by ShatterSeek R package (Cortés-Ciriano et al., 2020).  
749 Structural variants calls by SvABA and copy-number calls by TitanCNA were used as input data  
750 (excluding Y chromosome). In the input, consecutive segments were joined as one if they had the  
751 same copy-number value and centromere regions were filtered out.

752 Manual inspection was performed for reported chromothripsis-like events after adapting criteria  
753 thresholds. For samples based on short-read sequencing, confidence classification criteria were  
754 refined from the ShatterSeek documentation. Following criteria were used for high confidence  
755 calls: total number of intra-chromosomal structural variants events involved in the event  $\geq 10$ ; max  
756 number of oscillating CN segments (two states)  $\geq 10$ ; satisfying either the chromosomal  
757 enrichment or the exponential distribution of breakpoints test ( $p \leq 0.05$ ). For samples based on  
758 linked-read sequencing, we filtered these calls based on a weighted score that is primarily  
759 determined by the number of SVs in a cluster, with less weight given to CN oscillations. In this  
760 analysis, events with a score over 0.8 were considered as high confidence and all other events  
761 were excluded. The score is defined based on the following terms (ranges from 0 to 1).

- 762
- 763
- 764
- 765
- 766
- 767
- Weight 0.6 if total number of intra-chromosomal structural variants events involved in the event  $\geq 10$ .
  - Weight 0.2 for max number of oscillating CN segments (two states)  $\geq 7$  or max number of oscillating CN segments (three states)  $\geq 14$ .
  - Weight 0.1 for passing chromosomal enrichment test by ShatterSeek.
  - Weight 0.1 for passing exponential distribution of breakpoints test.

## 768 **Chromoplexy analysis**

769 ChainFinder was used to detect chromoplexy events (Baca et al., 2013). Ten samples that were  
770 considered as TDP (01115374-TA2, 01115202-TC2, 01115248-TA3, 01115503-TC2, 01115257-  
771 TA4, 01115284-TA9, 01115414-TA1, DTB-063-BL, DTB-183-BL, DTB-214-BL) were excluded  
772 from this analysis. In addition, four samples that were found to cause numeric instabilities of  
773 ChainFinder were also excluded (DTB-023-BL, DTB-102-PRO, DTB-111-PRO, DTB-151-BL).  
774 The SV calls of remaining samples were further filtered to exclude those that were located within  
775 5 Mb from chromosomal ends or overlapping chromothripsis regions. For copy-number input,  
776 segments that were determined as copy neutral by TitanCNA were set to have log copy-ratio of  
777 0. Copy-ratio of the other segments were computed from copy-number values generated by  
778 TitanCNA divided by 2 for autosomes or 1 for X chromosome. Log copy-ratio values less than -  
779 1.5 were set to -1.5. The output of ChainFinder was used for determining chromoplexy status of  
780 individual samples. A chromoplexy event was defined as a chain including at least 5  
781 rearrangement events and involving more than 2 different chromosomes. Samples having at least  
782 2 such events were considered positive for chromoplexy status.

## 783 **ChIP-seq data analysis**

784 ChIP-seq data used in this study were downloaded from Gene Expression Omnibus (GEO)  
785 (Barrett et al., 2013) and the Sequence Read Archive (SRA) (Leinonen et al., 2011). Short reads  
786 were mapped to the human genome GRCh38 (hg38) using bwa (Li and Durbin, 2009). Because  
787 read lengths were less than 50bp, the bwa aln command with default parameters was used for  
788 mapping. MACS2 (Zhang et al., 2008) was used to identify peaks from mapped ChIP-seq data.  
789 For histone modification marks, MACS2 callpeak command was applied with --nomodel --broad  
790 --extsize 146. For CTCF data, MACS2 callpeak command was used with --nomodel --extsize 200.  
791 Below is the list of ChIP-seq datasets involved in this analysis.

- 792 • H3K4me3, H3K27me3 and CTCF (GSE38685) (Bert et al., 2013).
- 793 • H3K36me3 and H3K9me3 (GSE98732) (Du et al., 2019).
- 794 • H3K4me1 and H3K27ac (GSE73785) (Taberlay et al., 2016).

795 For AR binding site (ARBS), the peak files were downloaded from two different datasets and  
796 converted to hg38 coordinates. For primary prostate cancer, ARBS data were downloaded from  
797 GSE70079 (Pomerantz et al., 2015). The union of all tumor sample peaks was used. For mCRPC,  
798 met-specific ARBS data were obtained from a previous study (Pomerantz et al., 2020).

## 799 **Identification of SRB regions**

### 800 *Masking the human genome based on mappability*

801 The human genome was divided into 100 kB non-overlapping bins for detection of significantly  
802 recurrent breakpoint regions (SRB). A low-mappability mask was generated for the hg38 genome  
803 to screen out out regions that are difficult for variant calling based on short-read sequencing. We  
804 adopted procedures from a previous study (Mallick et al., 2016) to construct a mask  
805 corresponding to regions with low mappability in the human genome. The unmasked regions were  
806 defined as the eligible territories for SRB detection. The 100 kB bins with less than 75% overlap  
807 with eligible territories were excluded from the analysis. Below is a list of masked regions included  
808 in the low-mappability mask.

- 809 • Composition mask. This set of masked regions includes regions with low sequence  
810 complexity detected by mdust, regions with long homopolymers detected by seqtk,  
811 satellite regions annotated by RepeatMasker (Smit, AFA, Hubley, R & Green, P, 2013),  
812 and low complexity regions annotated by RepeatMasker.



- 813
- Mappability mask. This mask was based on mappability of  $k$ -mers in the human genome hg38. The value  $k$  was set to 75 which is half of the read length of WGS data in this study. Each base in the genome was assigned a mappability level, based on the mapping ambiguity of all 75-mers overlapping this specific base. See below for the list of mappability levels.
- 814
- Level 0: all 75-mers overlapping this base could not be mapped to the genome uniquely.
- 815
- Level 1: more than 50% of overlapping 75-mers are not uniquely mapped.
- 816
- Level 2: more than 50% of overlapping 75-mers are uniquely mapped with 1-mismatch hits.
- 817
- Level 3: more than 50% of overlapping 75-mers are uniquely mapped without 1-mismatch hits.
- 818
- 819
- 820
- 821
- 822
- 823
- 824

825 Regions with mappability level 0 and 1 were included in the low-mappability mask.

### 826 *Generating covariates for regression analysis*

827 To accurately model the genomic features of mCRPC, we incorporated the following covariates.

- Nucleotide composition, including GC content, CpG fraction and TpC fraction per 10 kB non-overlapping bin in the genome.
  - Replication timing of LNCaP (data obtained from ENCODE under accession ENCFF995YGM, lifted over from hg19 to hg38) (Davis et al., 2018; ENCODE Project Consortium, 2012).
  - DNase I hypersensitive sites (data obtained from ENCODE under accession ENCFF434GSJ, lifted over to hg38).
  - Repeats annotated by RepeatMasker, including LINE, SINE, LTR, DNA transposon and simple repeats.
  - Heterochromatin regions inferred by ChromHMM (Ernst and Kellis, 2012) with the 18-state model parameters from the Roadmap Epigenomics Project (Roadmap Epigenomics Consortium et al., 2015), based LNCaP ChIP-seq data of H3K4me1, H3K4me3, H3K4ac H3K27me3, H3K36me3 and H3K9me3.
  - Common fragile sites downloaded from HGNC biomaart (Tweedie et al., 2021).
- 828
- 829
- 830
- 831
- 832
- 833
- 834
- 835
- 836
- 837
- 838
- 839
- 840
- 841

### 842 *SRB detection*

843 Structural variants from the final call set were used for statistical enrichment of recurrent breakpoints within 100 kB bins using a Gamma-Poisson regression implemented in the package, fish.hook (Imielinski et al., 2017). Breakpoints of SVs were treated independently. The Benjamini-Hochberg procedure was used for multiple testing correction and bins with  $q$ -value  $\leq 0.1$  were determined to be significant. The distances of individual known driver genes to those significant bins were evaluated based on the shortest genomic distance between the gene and bin boundaries, regardless of gene orientations.

844

845

846

847

848

849

### 850 *Annotation of gene alteration status*

#### 851 *Gene alteration by copy-number*

852 Copy-number segments were excluded if their cellular fraction was lower than 0.8, except for those which were determined as copy neutral or copy-number greater than 4. The gene annotation was based on known protein coding genes from GenCode release 30 (GRCh38.p12) (Frankish et al., 2019). For each gene, its copy-number was assigned to the copy-number value and LOH status of the segment that has the largest overlap with it. The gene-level copy-number was normalized based on ploidy of the corresponding sample, with autosomal genes normalized

853

854

855

856

857

858 by the inferred ploidy rounded to nearest integer, and X-linked genes normalized by half such  
859 value. Then the copy-number status of each gene was categorized based on the following criteria.

- 860 • Amplification. Normalized gene-level copy-number is greater than or equal to 2.5.
- 861 • Gain. Normalized gene-level copy-number is between 2 and 2.5.
- 862 • Homozygous deletion. Normalized gene-level copy-number is 0.
- 863 • Deletion with LOH. Normalized gene-level copy-number is between 0 and 1, and LOH  
864 status was found.
- 865 • Copy neutral LOH. Normalized gene-level copy-number is 1 and LOH status was found.

#### 866 *Gene alteration by structural variant*

867 Gene coordinates were based on ENSEMBL v33 of hg38 (Howe et al., 2021). Gene body region  
868 of one gene was defined as the widest region of all known isoforms collapsed. Gene flanking  
869 region was defined as the corresponding two 1 Mb regions next to the gene body region on 5'-  
870 end and 3'-end, respectively.

871 Gene alteration status by genome rearrangements was defined based on the breakpoints and  
872 directions of involving structural variant events. A gene in one WGS sample (gene-sample pair)  
873 was considered having gene transecting events if any breakpoints of SV events were located  
874 within the gene body region. If the gene transecting status did not apply, then this gene-sample  
875 pair was examined for gene flanking status if the breakpoints of any intra-chromosomal SV events,  
876 including tandem duplications, deletions, and inversions, were located within the gene flanking  
877 regions. Additionally, translocation events including intra-chromosomal balanced and unbalanced  
878 events which spanned over 10 Mb, and inter-chromosomal translocation events were considered  
879 altering the gene flanking regions if any of their breakpoints was in the gene flanking region, and  
880 the direction of the SV was going towards the gene body region. The alteration status of  
881 rearrangements for each gene-sample pair was exclusive between gene transecting and gene  
882 flanking, with the former being prioritized in report.

#### 883 *AR alteration analysis*

884 Copy-number of the *AR* gene (chrX:67,544,623-67,730,619) and the *AR* enhancer region  
885 (chrX:66,895,000-66,910,000) were each computed as the mean corrected total copy-number  
886 across the 10 kB bins overlapping each region. The copy-number was further normalized by  
887 sample ploidy as previously described. Amplification status of *AR* was determined by comparing  
888 the log<sub>2</sub> fold-change *FC* of enhancer-level over gene-level copy-number. Four distinct groups  
889 were defined based on copy-number and *FC* as below.

- 890 • Co-amplification. Ploidy normalized copy-number values of both *AR* gene body and  
891 enhancer are greater than 1.5.
- 892 • Selective *AR* amplification.  $FC < -\log_2(1.5)$  and enhancer copy-number is less than 1.5.
- 893 • Selective enhancer copy gain.  $FC > \log_2(1.5)$  and *AR* gene body copy-number is less than  
894 1.5.
- 895 • Lack of amplification for both. All other cases were considered as no amplification for both  
896 regions.

897 ANCOVA test was used to test if different patterns of *AR* amplification have an impact on *AR*  
898 expression. Batch corrected log<sub>10</sub>(TPM+1) values using ComBat from sva R package (v3.34.0)  
899 were used for *AR* expression level. We fit the ANCOVA model using *AR* expression as the  
900 response variable, *AR* amplification status as the predictor variable, and ploidy, purity as  
901 covariates. The function Anova in the car package (v3.0-5) was used with Type III sum of squares  
902 for the model. Post hoc analysis was performed to determine the specific differences among four

903 different *AR* amplification status. The function `glht` was used within the `multcomp` package (v1.4-  
904 11) in R to perform Tukey's Test for multiple comparisons.

## 905 **Gene expression**

906 TPM values for a subset of the samples based on linked-read sequencing were obtained from  
907 cBioportal (Cerami et al., 2012; Gao et al., 2013). For samples based on short-read sequencing  
908 the TPM values were obtained from a previous study (Quigley et al., 2018).

## 909 **Gene fusion analysis**

910 Fusion status of the main members of the ETS family, including *ERG*, *ETV1*, *ETV4*, *ETV5* and  
911 *ELK4* was analyzed. Determination of gene fusion status was based on both DNA and RNA levels.  
912 For DNA, structural variants transecting gene body regions were used. SV events were  
913 considered supporting gene fusion only if they satisfy the following criteria: (1) the breakpoints of  
914 this event must be located within the ETS gene and another protein coding gene, respectively; (2)  
915 the orientation of the breakpoint located within the ETS gene must be pointing towards the coding  
916 sequence of ETS domain. For RNA, `arriba` was used to detect fusion transcripts from RNA-seq  
917 data (Uhrig et al., 2021). The fusion status was only confirmed if all following conditions were  
918 satisfied: (1) the complete ETS domain was included in the fusion product; (2) detection  
919 confidence reported by `arriba` is "high"; (3) coding sequence in the fusion transcript was in sense  
920 orientation and no out-of-frame shifts.

## 921 **SV signature analysis**

### 922 *Signature extraction and clustering*

923 *De novo* signature extraction was performed on all SV events called by `SvABA` of the combined  
924 cohort using `signature.tools.lib` (Degasperi et al., 2020) with the recommended settings of 20  
925 bootstraps, 200 repeats, the clustering with matching algorithm, the KLD objective function, and  
926 `RTOL` = 0.001. The exposure of one signature in one sample is defined as the median activity of  
927 the signature within the sample across all bootstraps. For clustering, the reference signature  
928 exposure values for each sample based on short-read sequencing were normalized such that the  
929 sum of exposure values per sample is 1, and the normalized exposure values for each signature  
930 were mean-centered across all samples. A Euclidean distance matrix was computed and then  
931 samples were clustered with the `Ward.D2` algorithm using R's `hclust` function. We chose the  
932 number of clusters to be  $k = 9$  based on dendrogram using `cutree` function in R.

### 933 *Enrichment of alterations in SV clusters*

934 All 9 identified SV clusters were analyzed for enrichment of alterations. To make the analysis  
935 unbiased by SV signature, we limited our search to alteration types that were orthogonal to  
936 rearrangements, which include SNV, copy-number gain and copy-number loss. We performed  
937 hypothesis testing on each driver-alteration pair, and also on chromoplexy and chromothripsis.  
938 For each SV cluster, a  $\chi^2$  test was performed for each driver gene alteration status, with samples  
939 within group being tested against samples belonging to all 8 other SV clusters. Multiple testing  
940 adjustment based on Benjamini-Hochberg FDR was performed to compute q-values. Alteration  
941 categories with q-values less than 0.25 were determined as enriched in the corresponding SV  
942 cluster.

### 943 *Survival analysis*

944 Survival data was obtained from (Chen et al., 2019). Survival analyses were conducted using the  
945 Kaplan-Meier method with log-rank testing for significance. The function `survfit` from survival R  
946 package was used to perform the analysis.

## 947 SUPPLEMENTAL FIGURE LEGENDS

### 948 **Figure S1. Recurrent CNA and alteration profiles of most frequently altered genes, related** 949 **to Figure 1.**

950 **(A)** Recurrent copy number gain events in the genome. The frequencies of copy number gain are  
951 plotted in red according to their genomic coordinates. Regions with significantly recurring CNA  
952 are colored in black. Known driver genes that are within those regions are labeled.

953 **(B)** Recurrent copy number loss events in the genome. The frequencies of copy number loss are  
954 plotted in blue with y-axis inverted.

955 **(C)** Alteration profiles of known prostate cancer driver genes. Alterations are categorized into CNA,  
956 SNV and SV, with SV being further divided into gene transecting (SV tr.) and gene flanking (SV  
957 fl.). The percentages of samples carrying corresponding alterations are shown as stacked bars.  
958 All known prostate cancer driver genes were considered and the top 16 genes with overall  
959 alteration frequencies above 30% are shown.

### 960 **Figure S2. Recurrent SV in localized prostate cancer and landscape of ETS fusion in** 961 **mCRPC, related to Figure 2.**

962 **(A)** SRBs detected in the cohort of localized prostate cancers. The criteria for coloring and labeling  
963 are the same as Figure 2.

964 **(B)** Translocation events originating from *TTC28*. In the circos plot, *TTC28* is labeled with a  
965 vertical bar at the 22q12.1 locus. Translocation events which have breakpoints located within 5  
966 kB to the 3'-end of the L1 retrotransposon are visualized as blue arcs.

967 **(C)** Schematics of cumulative counts from intra-chromosomal SV events. Individual SV events  
968 are indicated by a grey arc, and colored crosses correspond to breakpoints of each event.

969 **(D)** Expression and fusion status for main genes of the ETS family. The expression values were  
970 normalized from TPM to z-score within each gene. Grey boxes indicate expression data are not  
971 available. For fusion status, color indicates the data type which was used to call fusion.

### 972 **Figure S3. Comparison of genomic alterations in disease states, related to Figure 3.**

973 **(A)** Alteration status of paired samples from the same patients before and after treatment. Known  
974 prostate driver genes with alteration status in any of the included samples are shown.

975 **(B)** Comparison of rearrangement frequency in different disease states of mCRPC. The known  
976 prostate cancer driver genes that were located within 1 Mb to any SRB region are included.

977 **(C)** *AR* splice variants in sample DTB-124-BL. The expression values of all known *AR* exons,  
978 including both canonical and cryptic ones, are shown in the top panel. In the bottom panel, the  
979 number of reads covering the junction sites of two exons are indicated by weighted arcs.

### 980 **Figure S4. Signature analysis of SV events, related to Figure 4.**

981 **(A)** Workflow of SV signature analysis. Samples involved in this analysis are described in green  
982 boxes. Details of relevant signatures are shown in blue boxes. The steps for obtaining the final 9  
983 SV clusters are indicated by numbers.

984 **(B)** Signature exposure based on de novo SV signatures. The exposure values of each sample  
985 were normalized such that the sample-wise sum is 1. Samples are ordered alphabetically based  
986 on names. The sequencing technology used for each sample is labeled at the bottom.



987 **(C)** Similarity between de novo SV signatures and reference signatures. Pairwise cosine similarity  
988 between de novo and reference SV signatures is shown.

989 **(D)** Comparison of reference signature (RefSig) prevalence between mCRPC and localized  
990 prostate cancer. The prevalence value for a signature in mCRPC was computed based on  
991 samples harboring at least 5% signature exposure. Localized prostate cancer prevalence values  
992 were obtained from [signal.mutationalsignatures.com](http://signal.mutationalsignatures.com) (Degasperi et al., 2020) computed from 199  
993 PCAWG samples.

994 **(E)** Kaplan Meier curve of prediction using mutation class of key marker genes. Samples were  
995 grouped based on the mutation status of the corresponding marker gene.

996 **(F)** Kaplan Meier curve of prediction using SV cluster information. Samples were grouped based  
997 on their assignments of the corresponding SV cluster.

998

## 999 SUPPLEMENTAL TABLE LEGENDS

### 1000 **Table S1. Sequencing, clinical and alteration information of all samples involved in this** 1001 **study. Related to Figures 1, 2, 4, S1-3.**

1002 **(A)** Sequencing metrics of all samples based on linked-read sequencing.

1003 **(B)** Clinical properties and key genomics metrics of the cohort.

1004 **(C)** Somatic mutation status of 159 prostate cancer drivers in the cohort. Sample and genes were  
1005 sorted alphabetically. Genes with no detected mutations were left blank.

1006 **(D)** Significantly mutated genes ( $q \leq 0.1$ ) detected by dN/dS algorithm.

1007 **(E)** Somatic copy-number alteration status of 159 prostate cancer drivers in the cohort.

1008 **(F)** Recurrent copy-number alteration peaks detected by GISTIC.

1009 **(G)** Gene transecting rearrangements of 159 prostate cancer drivers in the cohort. Types of  
1010 rearrangement events were included.

1011 **(H)** Gene flanking rearrangements of prostate cancer drivers in the cohort.

1012 **(I)** TITAN copy number segments for all samples. Columns with “Corrected\_\*\*” were used for  
1013 analysis in this study.

1014 **(J)** TITAN optimal solutions selected for all samples.

1015 **(K)** Structural variant calls for all samples. For samples with linked-read data (“CRPC10X”), union  
1016 set of detected calls from SvABA, GROCC-SVS, and Long Ranger are indicated. `SV.Filter`  
1017 indicate SV events after filtering. `support` contain evidence from various callers; manual curation  
1018 of events is indicated here. `CN\_overlap\_type` contain the final SV classification after annotation  
1019 with copy number information.

1020 **(L)** TDP status, copy number gain event counts, and median tandem duplication lengths for all  
1021 samples.

### 1022 **Table S2. Significantly recurrent breakpoint regions and ETS fusion. Related to Figure 2,** 1023 **S2 and S3.**

1024 **(A)** Significantly recurrent breakpoints (SRB) regions ( $q \leq 0.1$ ) in the mCRPC cohort of 143  
1025 samples.

1026 **(B)** Significantly recurrent breakpoints (SRB) regions ( $q \leq 0.1$ ) in the localized prostate cancer  
1027 cohort of 278 samples.

1028 **(C)** Fusion status of the ETS family genes. Gene expression was normalized to z-score for each  
1029 gene. Genes with no detected fusion events or available expression data were left blank.

### 1030 **Table S3. AR alteration patterns in the mCRPC cohort. Related to Figure 3 and S3.**

### 1031 **Table S4. SV signature in the mCRPC cohort. Related to Figure 4 and S4.**

1032 **(A)** Matrix of cosine similarity with rows representing reference signatures and columns  
1033 representing *de novo* signatures.

1034 **(B)** Exposure of all 8 *de novo* signatures in the cohort. Values were not normalized.

1035 **(C)** Exposure of 8 chosen reference signatures in the cohort. Values were not normalized.

1036

## 1037 REFERENCES

- 1038 Abida, W., Cheng, M.L., Armenia, J., Middha, S., Autio, K.A., Vargas, H.A., Rathkopf, D., Morris,  
1039 M.J., Danila, D.C., Slovin, S.F., et al. (2019). Analysis of the Prevalence of Microsatellite Instability  
1040 in Prostate Cancer and Response to Immune Checkpoint Blockade. *JAMA Oncol* 5, 471–478.
- 1041 Abida, W., Patnaik, A., Campbell, D., Shapiro, J., Bryce, A.H., McDermott, R., Sautois, B.,  
1042 Vogelzang, N.J., Bambury, R.M., Voog, E., et al. (2020). Rucaparib in Men With Metastatic  
1043 Castration-Resistant Prostate Cancer Harboring a BRCA1 or BRCA2 Gene Alteration. *J Clin*  
1044 *Oncol* 38, 3763–3772.
- 1045 Adalsteinsson, V.A., Ha, G., Freeman, S.S., Choudhury, A.D., Stover, D.G., Parsons, H.A.,  
1046 Gydush, G., Reed, S.C., Rotem, D., Rhoades, J., et al. (2017). Scalable whole-exome sequencing  
1047 of cell-free DNA reveals high concordance with metastatic tumors. *Nat. Commun.* 8, 1324.
- 1048 Alexandrov, L.B., Nik-Zainal, S., Wedge, D.C., Aparicio, S.A.J.R., Behjati, S., Biankin, A.V.,  
1049 Bignell, G.R., Bolli, N., Borg, A., Børresen-Dale, A.-L., et al. (2013). Signatures of mutational  
1050 processes in human cancer. *Nature* 500, 415–421.
- 1051 Alexandrov, L.B., Kim, J., Haradhvala, N.J., Huang, M.N., Tian Ng, A.W., Wu, Y., Boot, A.,  
1052 Covington, K.R., Gordenin, D.A., Bergstrom, E.N., et al. (2020). The repertoire of mutational  
1053 signatures in human cancer. *Nature* 578, 94–101.
- 1054 Armenia, J., Wankowicz, S.A.M., Liu, D., Gao, J., Kundra, R., Reznik, E., Chatila, W.K.,  
1055 Chakravarty, D., Han, G.C., Coleman, I., et al. (2018). The long tail of oncogenic drivers in  
1056 prostate cancer. *Nature Genetics* 50, 645–651.
- 1057 Baca, S.C., Prandi, D., Lawrence, M.S., Mosquera, J.M., Romanel, A., Drier, Y., Park, K.,  
1058 Kitabayashi, N., MacDonald, T.Y., Ghandi, M., et al. (2013). Punctuated evolution of prostate  
1059 cancer genomes. *Cell* 153, 666–677.
- 1060 Barbieri, C.E., Baca, S.C., Lawrence, M.S., Demichelis, F., Blattner, M., Theurillat, J.-P., White,  
1061 T.A., Stojanov, P., Van Allen, E., Stransky, N., et al. (2012). Exome sequencing identifies  
1062 recurrent SPOP, FOXA1 and MED12 mutations in prostate cancer. *Nat Genet* 44, 685–689.
- 1063 Barrett, T., Wilhite, S.E., Ledoux, P., Evangelista, C., Kim, I.F., Tomashevsky, M., Marshall, K.A.,  
1064 Phillippy, K.H., Sherman, P.M., Holko, M., et al. (2013). NCBI GEO: archive for functional  
1065 genomics data sets--update. *Nucleic Acids Res* 41, D991-995.
- 1066 Bert, S.A., Robinson, M.D., Strbenac, D., Statham, A.L., Song, J.Z., Hulf, T., Sutherland, R.L.,  
1067 Coolen, M.W., Stirzaker, C., and Clark, S.J. (2013). Regional activation of the cancer genome by  
1068 long-range epigenetic remodeling. *Cancer Cell* 23, 9–22.
- 1069 de Bono, J., Mateo, J., Fizazi, K., Saad, F., Shore, N., Sandhu, S., Chi, K.N., Sartor, O., Agarwal,  
1070 N., Olmos, D., et al. (2020). Olaparib for Metastatic Castration-Resistant Prostate Cancer. *N Engl*  
1071 *J Med* 382, 2091–2102.
- 1072 de Bono, J.S., Logothetis, C.J., Molina, A., Fizazi, K., North, S., Chu, L., Chi, K.N., Jones, R.J.,  
1073 Goodman, O.B., Saad, F., et al. (2011). Abiraterone and Increased Survival in Metastatic Prostate  
1074 Cancer. *N Engl J Med* 364, 1995–2005.

- 1075 Brand, L.J., and Dehm, S.M. (2013). Androgen Receptor Gene Rearrangements: New  
1076 Perspectives on Prostate Cancer Progression. *Curr Drug Targets* 14, 441–449.
- 1077 Campbell, P.J., Getz, G., Korbel, J.O., Stuart, J.M., Jennings, J.L., Stein, L.D., Perry, M.D., Nahal-  
1078 Bose, H.K., Ouellette, B.F.F., Li, C.H., et al. (2020). Pan-cancer analysis of whole genomes.  
1079 *Nature* 578, 82–93.
- 1080 Cancer Genome Atlas Research Network (2015). The Molecular Taxonomy of Primary Prostate  
1081 Cancer. *Cell* 163, 1011–1025.
- 1082 Carrot-Zhang, J., and Majewski, J. (2017). LoLoPicker: detecting low allelic-fraction variants from  
1083 low-quality cancer samples. *Oncotarget* 8, 37032.
- 1084 Céraline, J., Cruchant, M.D., Erdmann, E., Erbs, P., Kurtz, J.-E., Duclos, B., Jacqmin, D., Chopin,  
1085 D., and Bergerat, J.-P. (2004). Constitutive activation of the androgen receptor by a point mutation  
1086 in the hinge region: a new mechanism for androgen-independent growth in prostate cancer. *Int.*  
1087 *J. Cancer* 108, 152–157.
- 1088 Cerami, E., Gao, J., Dogrusoz, U., Gross, B.E., Sumer, S.O., Aksoy, B.A., Jacobsen, A., Byrne,  
1089 C.J., Heuer, M.L., Larsson, E., et al. (2012). The cBio Cancer Genomics Portal: An Open Platform  
1090 for Exploring Multidimensional Cancer Genomics Data: Figure 1. *Cancer Discovery* 2, 401–404.
- 1091 Chen, C.D., Welsbie, D.S., Tran, C., Baek, S.H., Chen, R., Vessella, R., Rosenfeld, M.G., and  
1092 Sawyers, C.L. (2004). Molecular determinants of resistance to antiandrogen therapy. *Nature*  
1093 *Medicine* 10, 33–39.
- 1094 Chen, J., Lui, W.-O., Vos, M.D., Clark, G.J., Takahashi, M., Schoumans, J., Khoo, S.K., Petillo,  
1095 D., Lavery, T., Sugimura, J., et al. (2003). The t(1;3) breakpoint-spanning genes LSAMP and  
1096 NORE1 are involved in clear cell renal cell carcinomas. *Cancer Cell* 4, 405–413.
- 1097 Chen, W.S., Aggarwal, R., Zhang, L., Zhao, S.G., Thomas, G.V., Beer, T.M., Quigley, D.A., Foye,  
1098 A., Playdle, D., Huang, J., et al. (2019). Genomic Drivers of Poor Prognosis and Enzalutamide  
1099 Resistance in Metastatic Castration-resistant Prostate Cancer. *Eur Urol* 76, 562–571.
- 1100 Cortés-Ciriano, I., Lee, J.J.-K., Xi, R., Jain, D., Jung, Y.L., Yang, L., Gordenin, D., Klimczak, L.J.,  
1101 Zhang, C.-Z., Pellman, D.S., et al. (2020). Comprehensive analysis of chromothripsis in 2,658  
1102 human cancers using whole-genome sequencing. *Nat Genet* 52, 331–341.
- 1103 Davis, C.A., Hitz, B.C., Sloan, C.A., Chan, E.T., Davidson, J.M., Gabdank, I., Hilton, J.A., Jain,  
1104 K., Baymuradov, U.K., Narayanan, A.K., et al. (2018). The Encyclopedia of DNA elements  
1105 (ENCODE): data portal update. *Nucleic Acids Res* 46, D794–D801.
- 1106 Degasperi, A., Amarante, T.D., Czarnecki, J., Shooter, S., Zou, X., Glodzik, D., Morganella, S.,  
1107 Nanda, A.S., Badja, C., Koh, G., et al. (2020). A practical framework and online tool for mutational  
1108 signature analyses show inter-tissue variation and driver dependencies. *Nat Cancer* 1, 249–263.
- 1109 van Dessel, L.F., van Riet, J., Smits, M., Zhu, Y., Hamberg, P., van der Heijden, M.S., Bergman,  
1110 A.M., van Oort, I.M., de Wit, R., Voest, E.E., et al. (2019). The genomic landscape of metastatic  
1111 castration-resistant prostate cancers reveals multiple distinct genotypes with potential clinical  
1112 impact. *Nat Commun* 10, 5251.



- 1113 Du, Q., Bert, S.A., Armstrong, N.J., Caldon, C.E., Song, J.Z., Nair, S.S., Gould, C.M., Luu, P.-L.,  
1114 Peters, T., Khoury, A., et al. (2019). Replication timing and epigenome remodelling are associated  
1115 with the nature of chromosomal rearrangements in cancer. *Nat Commun* 10, 416.
- 1116 ENCODE Project Consortium (2012). An integrated encyclopedia of DNA elements in the human  
1117 genome. *Nature* 489, 57–74.
- 1118 Ernst, J., and Kellis, M. (2012). ChromHMM: automating chromatin-state discovery and  
1119 characterization. *Nat Methods* 9, 215–216.
- 1120 Frankish, A., Diekhans, M., Ferreira, A.-M., Johnson, R., Jungreis, I., Loveland, J., Mudge, J.M.,  
1121 Sisu, C., Wright, J., Armstrong, J., et al. (2019). GENCODE reference annotation for the human  
1122 and mouse genomes. *Nucleic Acids Res* 47, D766–D773.
- 1123 Fraser, M., Livingstone, J., Wrana, J.L., Finelli, A., He, H.H., van der Kwast, T., Zlotta, A.R.,  
1124 Bristow, R.G., and Boutros, P.C. (2021). Somatic driver mutation prevalence in 1844 prostate  
1125 cancers identifies ZNRF3 loss as a predictor of metastatic relapse. *Nat Commun* 12, 6248.
- 1126 Gao, J., Aksoy, B.A., Dogrusoz, U., Dresdner, G., Gross, B., Sumer, S.O., Sun, Y., Jacobsen, A.,  
1127 Sinha, R., Larsson, E., et al. (2013). Integrative analysis of complex cancer genomics and clinical  
1128 profiles using the cBioPortal. *Sci Signal* 6, p11.
- 1129 Giambartolomei, C., Seo, J.-H., Schwarz, T., Freund, M.K., Johnson, R.D., Spisak, S., Baca, S.C.,  
1130 Gusev, A., Mancuso, N., Pasaniuc, B., et al. (2021). H3K27ac HiChIP in prostate cell lines  
1131 identifies risk genes for prostate cancer susceptibility. *The American Journal of Human Genetics*  
1132 108, 2284–2300.
- 1133 Glodzik, D., Morganello, S., Davies, H., Simpson, P.T., Li, Y., Zou, X., Diez-Perez, J., Staaf, J.,  
1134 Alexandrov, L.B., Smid, M., et al. (2017). A somatic-mutational process recurrently duplicates  
1135 germline susceptibility loci and tissue-specific super-enhancers in breast cancers. *Nat Genet* 49,  
1136 341–348.
- 1137 Grasso, C.S., Wu, Y.-M., Robinson, D.R., Cao, X., Dhanasekaran, S.M., Khan, A.P., Quist, M.J.,  
1138 Jing, X., Lonigro, R.J., Brenner, J.C., et al. (2012). The mutational landscape of lethal castration-  
1139 resistant prostate cancer. *Nature* 487, 239–243.
- 1140 Ha, G., Roth, A., Khattra, J., Ho, J., Yap, D., Prentice, L.M., Melnyk, N., McPherson, A.,  
1141 Bashashati, A., Laks, E., et al. (2014). TITAN: inference of copy number architectures in clonal  
1142 cell populations from tumor whole-genome sequence data. *Genome Res* 24, 1881–1893.
- 1143 Hadi, K., Yao, X., Behr, J.M., Deshpande, A., Xanthopoulos, C., Tian, H., Kudman, S., Rosiene,  
1144 J., Darmofal, M., DeRose, J., et al. (2020). Distinct Classes of Complex Structural Variation  
1145 Uncovered across Thousands of Cancer Genome Graphs. *Cell* 183, 197-210.e32.
- 1146 Haffner, M.C., Aryee, M.J., Toubaji, A., Esopi, D.M., Albadine, R., Gurel, B., Isaacs, W.B., Bova,  
1147 G.S., Liu, W., Xu, J., et al. (2010). Androgen-induced TOP2B-mediated double-strand breaks and  
1148 prostate cancer gene rearrangements. *Nat Genet* 42, 668–675.
- 1149 Henzler, C., Li, Y., Yang, R., McBride, T., Ho, Y., Sprenger, C., Liu, G., Coleman, I., Lakely, B.,  
1150 Li, R., et al. (2016). Truncation and constitutive activation of the androgen receptor by diverse  
1151 genomic rearrangements in prostate cancer. *Nat Commun* 7, 13668.

- 1152 Howe, K.L., Achuthan, P., Allen, J., Allen, J., Alvarez-Jarreta, J., Amode, M.R., Armean, I.M.,  
1153 Azov, A.G., Bennett, R., Bhai, J., et al. (2021). Ensembl 2021. *Nucleic Acids Res* 49, D884–D891.
- 1154 Imielinski, M., Guo, G., and Meyerson, M. (2017). Insertions and Deletions Target Lineage-  
1155 Defining Genes in Human Cancers. *Cell* 168, 460-472.e14.
- 1156 Kanayama, M., Lu, C., Luo, J., and Antonarakis, E.S. (2021). AR Splicing Variants and Resistance  
1157 to AR Targeting Agents. *Cancers (Basel)* 13, 2563.
- 1158 Kresse, S.H., Ohnstad, H.O., Paulsen, E.B., Bjerkehagen, B., Szuhai, K., Serra, M., Schaefer, K.-  
1159 L., Myklebost, O., and Meza-Zepeda, L.A. (2009). LSAMP, a novel candidate tumor suppressor  
1160 gene in human osteosarcomas, identified by array comparative genomic hybridization. *Genes*  
1161 *Chromosomes Cancer* 48, 679–693.
- 1162 Kühn, M.W.M., Radtke, I., Bullinger, L., Goorha, S., Cheng, J., Edelmann, J., Gohlke, J., Su, X.,  
1163 Paschka, P., Pounds, S., et al. (2012). High-resolution genomic profiling of adult and pediatric  
1164 core-binding factor acute myeloid leukemia reveals new recurrent genomic alterations. *Blood* 119,  
1165 e67.
- 1166 Kumar-Sinha, C., Kalyana-Sundaram, S., and Chinnaiyan, A.M. (2015). Landscape of gene  
1167 fusions in epithelial cancers: seq and ye shall find. *Genome Medicine* 7, 129.
- 1168 Leinonen, R., Sugawara, H., Shumway, M., and International Nucleotide Sequence Database  
1169 Collaboration (2011). The sequence read archive. *Nucleic Acids Res* 39, D19-21.
- 1170 Li, H., and Durbin, R. (2009). Fast and accurate short read alignment with Burrows-Wheeler  
1171 transform. *Bioinformatics* 25, 1754–1760.
- 1172 Li, Y., Roberts, N.D., Wala, J.A., Shapira, O., Schumacher, S.E., Kumar, K., Khurana, E., Waszak,  
1173 S., Korbil, J.O., Haber, J.E., et al. (2020). Patterns of somatic structural variation in human cancer  
1174 genomes. *Nature* 578, 112–121.
- 1175 Macintyre, G., Goranova, T.E., De Silva, D., Ennis, D., Piskorz, A.M., Eldridge, M., Sie, D.,  
1176 Lewsley, L.-A., Hanif, A., Wilson, C., et al. (2018). Copy number signatures and mutational  
1177 processes in ovarian carcinoma. *Nat Genet* 50, 1262–1270.
- 1178 Mallick, S., Li, H., Lipson, M., Mathieson, I., Gymrek, M., Racimo, F., Zhao, M., Chennagiri, N.,  
1179 Nordenfelt, S., Tandon, A., et al. (2016). The Simons Genome Diversity Project: 300 genomes  
1180 from 142 diverse populations. *Nature* 538, 201–206.
- 1181 Martincorena, I., Raine, K.M., Gerstung, M., Dawson, K.J., Haase, K., Van Loo, P., Davies, H.,  
1182 Stratton, M.R., and Campbell, P.J. (2017). Universal Patterns of Selection in Cancer and Somatic  
1183 Tissues. *Cell* 171, 1029-1041.e21.
- 1184 Mateo, J., McKay, R., Abida, W., Aggarwal, R., Alumkal, J., Alva, A., Feng, F., Gao, X., Graff, J.,  
1185 Hussain, M., et al. (2020). Accelerating precision medicine in metastatic prostate cancer. *Nat*  
1186 *Cancer* 1, 1041–1053.
- 1187 Nguyen, B., Mota, J.M., Nandakumar, S., Stopsack, K.H., Weg, E., Rathkopf, D., Morris, M.J.,  
1188 Scher, H.I., Kantoff, P.W., Gopalan, A., et al. (2020). Pan-cancer Analysis of CDK12 Alterations

- 1189 Identifies a Subset of Prostate Cancers with Distinct Genomic and Clinical Characteristics.  
1190 *European Urology* 78, 671–679.
- 1191 Nik-Zainal, S., Davies, H., Staaf, J., Ramakrishna, M., Glodzik, D., Zou, X., Martincorena, I.,  
1192 Alexandrov, L.B., Martin, S., Wedge, D.C., et al. (2016). Landscape of somatic mutations in 560  
1193 breast cancer whole-genome sequences. *Nature* 534, 47–54.
- 1194 Petrovics, G., Li, H., Stümpel, T., Tan, S.-H., Young, D., Katta, S., Li, Q., Ying, K., Klocke, B.,  
1195 Ravindranath, L., et al. (2015). A novel genomic alteration of LSAMP associates with aggressive  
1196 prostate cancer in African American men. *EBioMedicine* 2, 1957.
- 1197 Pitkänen, E., Cajuso, T., Katainen, R., Kaasinen, E., Välimäki, N., Palin, K., Taipale, J., Aaltonen,  
1198 L.A., and Kilpivaara, O. (2014). Frequent L1 retrotranspositions originating from TTC28 in  
1199 colorectal cancer. *Oncotarget* 5, 853–859.
- 1200 Pomerantz, M.M., Li, F., Takeda, D.Y., Lenci, R., Chonkar, A., Chabot, M., Cejas, P., Vazquez,  
1201 F., Cook, J., Shivdasani, R.A., et al. (2015). The androgen receptor cistrome is extensively  
1202 reprogrammed in human prostate tumorigenesis. *Nat Genet* 47, 1346–1351.
- 1203 Pomerantz, M.M., Qiu, X., Zhu, Y., Takeda, D.Y., Pan, W., Baca, S.C., Gusev, A., Korthauer, K.D.,  
1204 Severson, T.M., Ha, G., et al. (2020). Prostate cancer reactivates developmental epigenomic  
1205 programs during metastatic progression. *Nat. Genet.*
- 1206 Pradhan, B., Cajuso, T., Katainen, R., Sulo, P., Tanskanen, T., Kilpivaara, O., Pitkänen, E.,  
1207 Aaltonen, L.A., Kauppi, L., and Palin, K. (2017). Detection of subclonal L1 transductions in  
1208 colorectal cancer by long-distance inverse-PCR and Nanopore sequencing. *Sci Rep* 7, 14521.
- 1209 Pritchard, C.C., Mateo, J., Walsh, M.F., De Sarkar, N., Abida, W., Beltran, H., Garofalo, A., Gulati,  
1210 R., Carreira, S., Eeles, R., et al. (2016). Inherited DNA-Repair Gene Mutations in Men with  
1211 Metastatic Prostate Cancer. *New England Journal of Medicine* 375, 443–453.
- 1212 Qin, F., Zhang, Y., Liu, J., and Li, H. (2017). SLC45A3-ELK4 functions as a long non-coding  
1213 chimeric RNA. *Cancer Lett* 404, 53–61.
- 1214 Quigley, D.A., Dang, H.X., Zhao, S.G., Lloyd, P., Aggarwal, R., Alumkal, J.J., Foye, A., Kothari,  
1215 V., Perry, M.D., Bailey, A.M., et al. (2018). Genomic Hallmarks and Structural Variation in  
1216 Metastatic Prostate Cancer. *Cell* 174, 758-769.e9.
- 1217 Rickman, D.S., Pflueger, D., Moss, B., VanDoren, V.E., Chen, C.X., de la Taille, A., Kuefer, R.,  
1218 Tewari, A.K., Setlur, S.R., Demichelis, F., et al. (2009). SLC45A3-ELK4 is a novel and frequent  
1219 erythroblast transformation-specific fusion transcript in prostate cancer. *Cancer Res* 69, 2734–  
1220 2738.
- 1221 Roadmap Epigenomics Consortium, Kundaje, A., Meuleman, W., Ernst, J., Bilenky, M., Yen, A.,  
1222 Heravi-Moussavi, A., Kheradpour, P., Zhang, Z., Wang, J., et al. (2015). Integrative analysis of  
1223 111 reference human epigenomes. *Nature* 518, 317–330.
- 1224 Saunders, C.T., Wong, W.S.W., Swamy, S., Becq, J., Murray, L.J., and Cheetham, R.K. (2012).  
1225 Strelka: accurate somatic small-variant calling from sequenced tumor-normal sample pairs.  
1226 *Bioinformatics* 28, 1811–1817.

- 1227 Scher, H.I., Fizazi, K., Saad, F., Taplin, M.-E., Sternberg, C.N., Miller, K., de Wit, R., Mulders, P.,  
1228 Chi, K.N., Shore, N.D., et al. (2012). Increased Survival with Enzalutamide in Prostate Cancer  
1229 after Chemotherapy. *New England Journal of Medicine* 367, 1187–1197.
- 1230 Smit, AFA, Hubley, R & Green, P (2013). RepeatMasker Open-4.0.
- 1231 Spies, N., Weng, Z., Bishara, A., McDaniel, J., Catoe, D., Zook, J.M., Salit, M., West, R.B.,  
1232 Batzoglou, S., and Sidow, A. (2017). Genome-wide reconstruction of complex structural variants  
1233 using read clouds. *Nature Methods*.
- 1234 Stephens, P.J., Greenman, C.D., Fu, B., Yang, F., Bignell, G.R., Mudie, L.J., Pleasance, E.D.,  
1235 Lau, K.W., Beare, D., Stebbings, L.A., et al. (2011). Massive genomic rearrangement acquired in  
1236 a single catastrophic event during cancer development. *Cell* 144, 27–40.
- 1237 Taberlay, P.C., Achinger-Kawecka, J., Lun, A.T.L., Buske, F.A., Sabir, K., Gould, C.M., Zotenko,  
1238 E., Bert, S.A., Giles, K.A., Bauer, D.C., et al. (2016). Three-dimensional disorganization of the  
1239 cancer genome occurs coincident with long-range genetic and epigenetic alterations. *Genome*  
1240 *Res* 26, 719–731.
- 1241 Takeda, D.Y., Spisák, S., Seo, J.-H., Bell, C., O'Connor, E., Korthauer, K., Ribli, D., Csabai, I.,  
1242 Solymosi, N., Szállási, Z., et al. (2018). A Somatic Acquired Enhancer of the Androgen  
1243 Receptor Is a Noncoding Driver in Advanced Prostate Cancer. *Cell* 174, 422-432.e13.
- 1244 Tate, J.G., Bamford, S., Jubb, H.C., Sondka, Z., Beare, D.M., Bindal, N., Boutselakis, H., Cole,  
1245 C.G., Creatore, C., Dawson, E., et al. (2019). COSMIC: the Catalogue Of Somatic Mutations In  
1246 Cancer. *Nucleic Acids Res* 47, D941–D947.
- 1247 Tomlins, S.A., Rhodes, D.R., Perner, S., Dhanasekaran, S.M., Mehra, R., Sun, X.-W., Varambally,  
1248 S., Cao, X., Tchinda, J., Kuefer, R., et al. (2005). Recurrent fusion of TMPRSS2 and ETS  
1249 transcription factor genes in prostate cancer. *Science* 310, 644–648.
- 1250 Tomlins, S.A., Laxman, B., Dhanasekaran, S.M., Helgeson, B.E., Cao, X., Morris, D.S., Menon,  
1251 A., Jing, X., Cao, Q., Han, B., et al. (2007). Distinct classes of chromosomal rearrangements  
1252 create oncogenic ETS gene fusions in prostate cancer. *Nature* 448, 595–599.
- 1253 Tubio, J.M.C., Li, Y., Ju, Y.S., Martincorena, I., Cooke, S.L., Tojo, M., Gundem, G., Pipinikas,  
1254 C.P., Zamora, J., Raine, K., et al. (2014). Mobile DNA in cancer. Extensive transduction of  
1255 nonrepetitive DNA mediated by L1 retrotransposition in cancer genomes. *Science* 345, 1251343.
- 1256 Tweedie, S., Braschi, B., Gray, K., Jones, T.E.M., Seal, R.L., Yates, B., and Bruford, E.A. (2021).  
1257 Genenames.org: the HGNC and VGNC resources in 2021. *Nucleic Acids Res* 49, D939–D946.
- 1258 Uhrig, S., Ellermann, J., Walther, T., Burkhardt, P., Fröhlich, M., Hutter, B., Toprak, U.H.,  
1259 Neumann, O., Stenzinger, A., Scholl, C., et al. (2021). Accurate and efficient detection of gene  
1260 fusions from RNA sequencing data. *Genome Res* 31, 448–460.
- 1261 Umbreit, N.T., Zhang, C.-Z., Lynch, L.D., Blaine, L.J., Cheng, A.M., Tourdot, R., Sun, L.,  
1262 Almubarak, H.F., Judge, K., Mitchell, T.J., et al. (2020). Mechanisms generating cancer genome  
1263 complexity from a single cell division error. *Science* 368, eaba0712.
- 1264 Van der Auwera, G.A., and O'Connor, B. (2020). Genomics in the Cloud.

- 1265 Veeriah, S., Brennan, C., Meng, S., Singh, B., Fagin, J.A., Solit, D.B., Paty, P.B., Rohle, D.,  
1266 Vivanco, I., Chmielecki, J., et al. (2009). The tyrosine phosphatase PTPRD is a tumor suppressor  
1267 that is frequently inactivated and mutated in glioblastoma and other human cancers. *PNAS* *106*,  
1268 9435–9440.
- 1269 Visakorpi, T., Hyytinen, E., Koivisto, P., Tanner, M., Keinänen, R., Palmberg, C., Palotie, A.,  
1270 Tammela, T., Isola, J., and Kallioniemi, O.P. (1995). In vivo amplification of the androgen receptor  
1271 gene and progression of human prostate cancer. *Nat. Genet.* *9*, 401–406.
- 1272 Viswanathan, S.R., Ha, G., Hoff, A.M., Wala, J.A., Carrot-Zhang, J., Whelan, C.W., Haradhvala,  
1273 N.J., Freeman, S.S., Reed, S.C., Rhoades, J., et al. (2018). Structural Alterations Driving  
1274 Castration-Resistant Prostate Cancer Revealed by Linked-Read Genome Sequencing. *Cell* *174*,  
1275 433-447.e19.
- 1276 Wala, J.A., Bandopadhyay, P., Greenwald, N.F., O'Rourke, R., Sharpe, T., Stewart, C.,  
1277 Schumacher, S., Li, Y., Weischenfeldt, J., Yao, X., et al. (2018). SvABA: genome-wide detection  
1278 of structural variants and indels by local assembly. *Genome Res* *28*, 581–591.
- 1279 Wang, S., Li, H., Song, M., Tao, Z., Wu, T., He, Z., Zhao, X., Wu, K., and Liu, X.-S. (2021). Copy  
1280 number signature analysis tool and its application in prostate cancer reveals distinct mutational  
1281 processes and clinical outcomes. *PLoS Genet* *17*, e1009557.
- 1282 Weinhold, N., Jacobsen, A., Schultz, N., Sander, C., and Lee, W. (2014). Genome-wide analysis  
1283 of noncoding regulatory mutations in cancer. *Nat Genet* *46*, 1160–1165.
- 1284 Willis, N.A., Frock, R.L., Menghi, F., Duffey, E.E., Panday, A., Camacho, V., Hasty, E.P., Liu, E.T.,  
1285 Alt, F.W., and Scully, R. (2017). Mechanism of tandem duplication formation in BRCA1-mutant  
1286 cells. *Nature*.
- 1287 Wu, Y.-M., Cieřlik, M., Lonigro, R.J., Vats, P., Reimers, M.A., Cao, X., Ning, Y., Wang, L., Kunju,  
1288 L.P., de Sarkar, N., et al. (2018). Inactivation of CDK12 Delineates a Distinct Immunogenic Class  
1289 of Advanced Prostate Cancer. *Cell* *173*, 1770-1782.e14.
- 1290 Yuan, X., Cai, C., Chen, S., Chen, S., Yu, Z., and Balk, S.P. (2014). Androgen receptor functions  
1291 in castration-resistant prostate cancer and mechanisms of resistance to new agents targeting the  
1292 androgen axis. *Oncogene* *33*, 2815–2825.
- 1293 Zhang, Y., Liu, T., Meyer, C.A., Eeckhoute, J., Johnson, D.S., Bernstein, B.E., Nusbaum, C.,  
1294 Myers, R.M., Brown, M., Li, W., et al. (2008). Model-based analysis of ChIP-Seq (MACS).  
1295 *Genome Biol* *9*, R137.
- 1296 Zhang, Y., Gong, M., Yuan, H., Park, H.G., Frierson, H.F., and Li, H. (2012). Chimeric transcript  
1297 generated by cis-splicing of adjacent genes regulates prostate cancer cell proliferation. *Cancer*  
1298 *Discov* *2*, 598–607.
- 1299 Gene Expression Omnibus: NCBI gene expression and hybridization array data repository -  
1300 PubMed.
- 1301



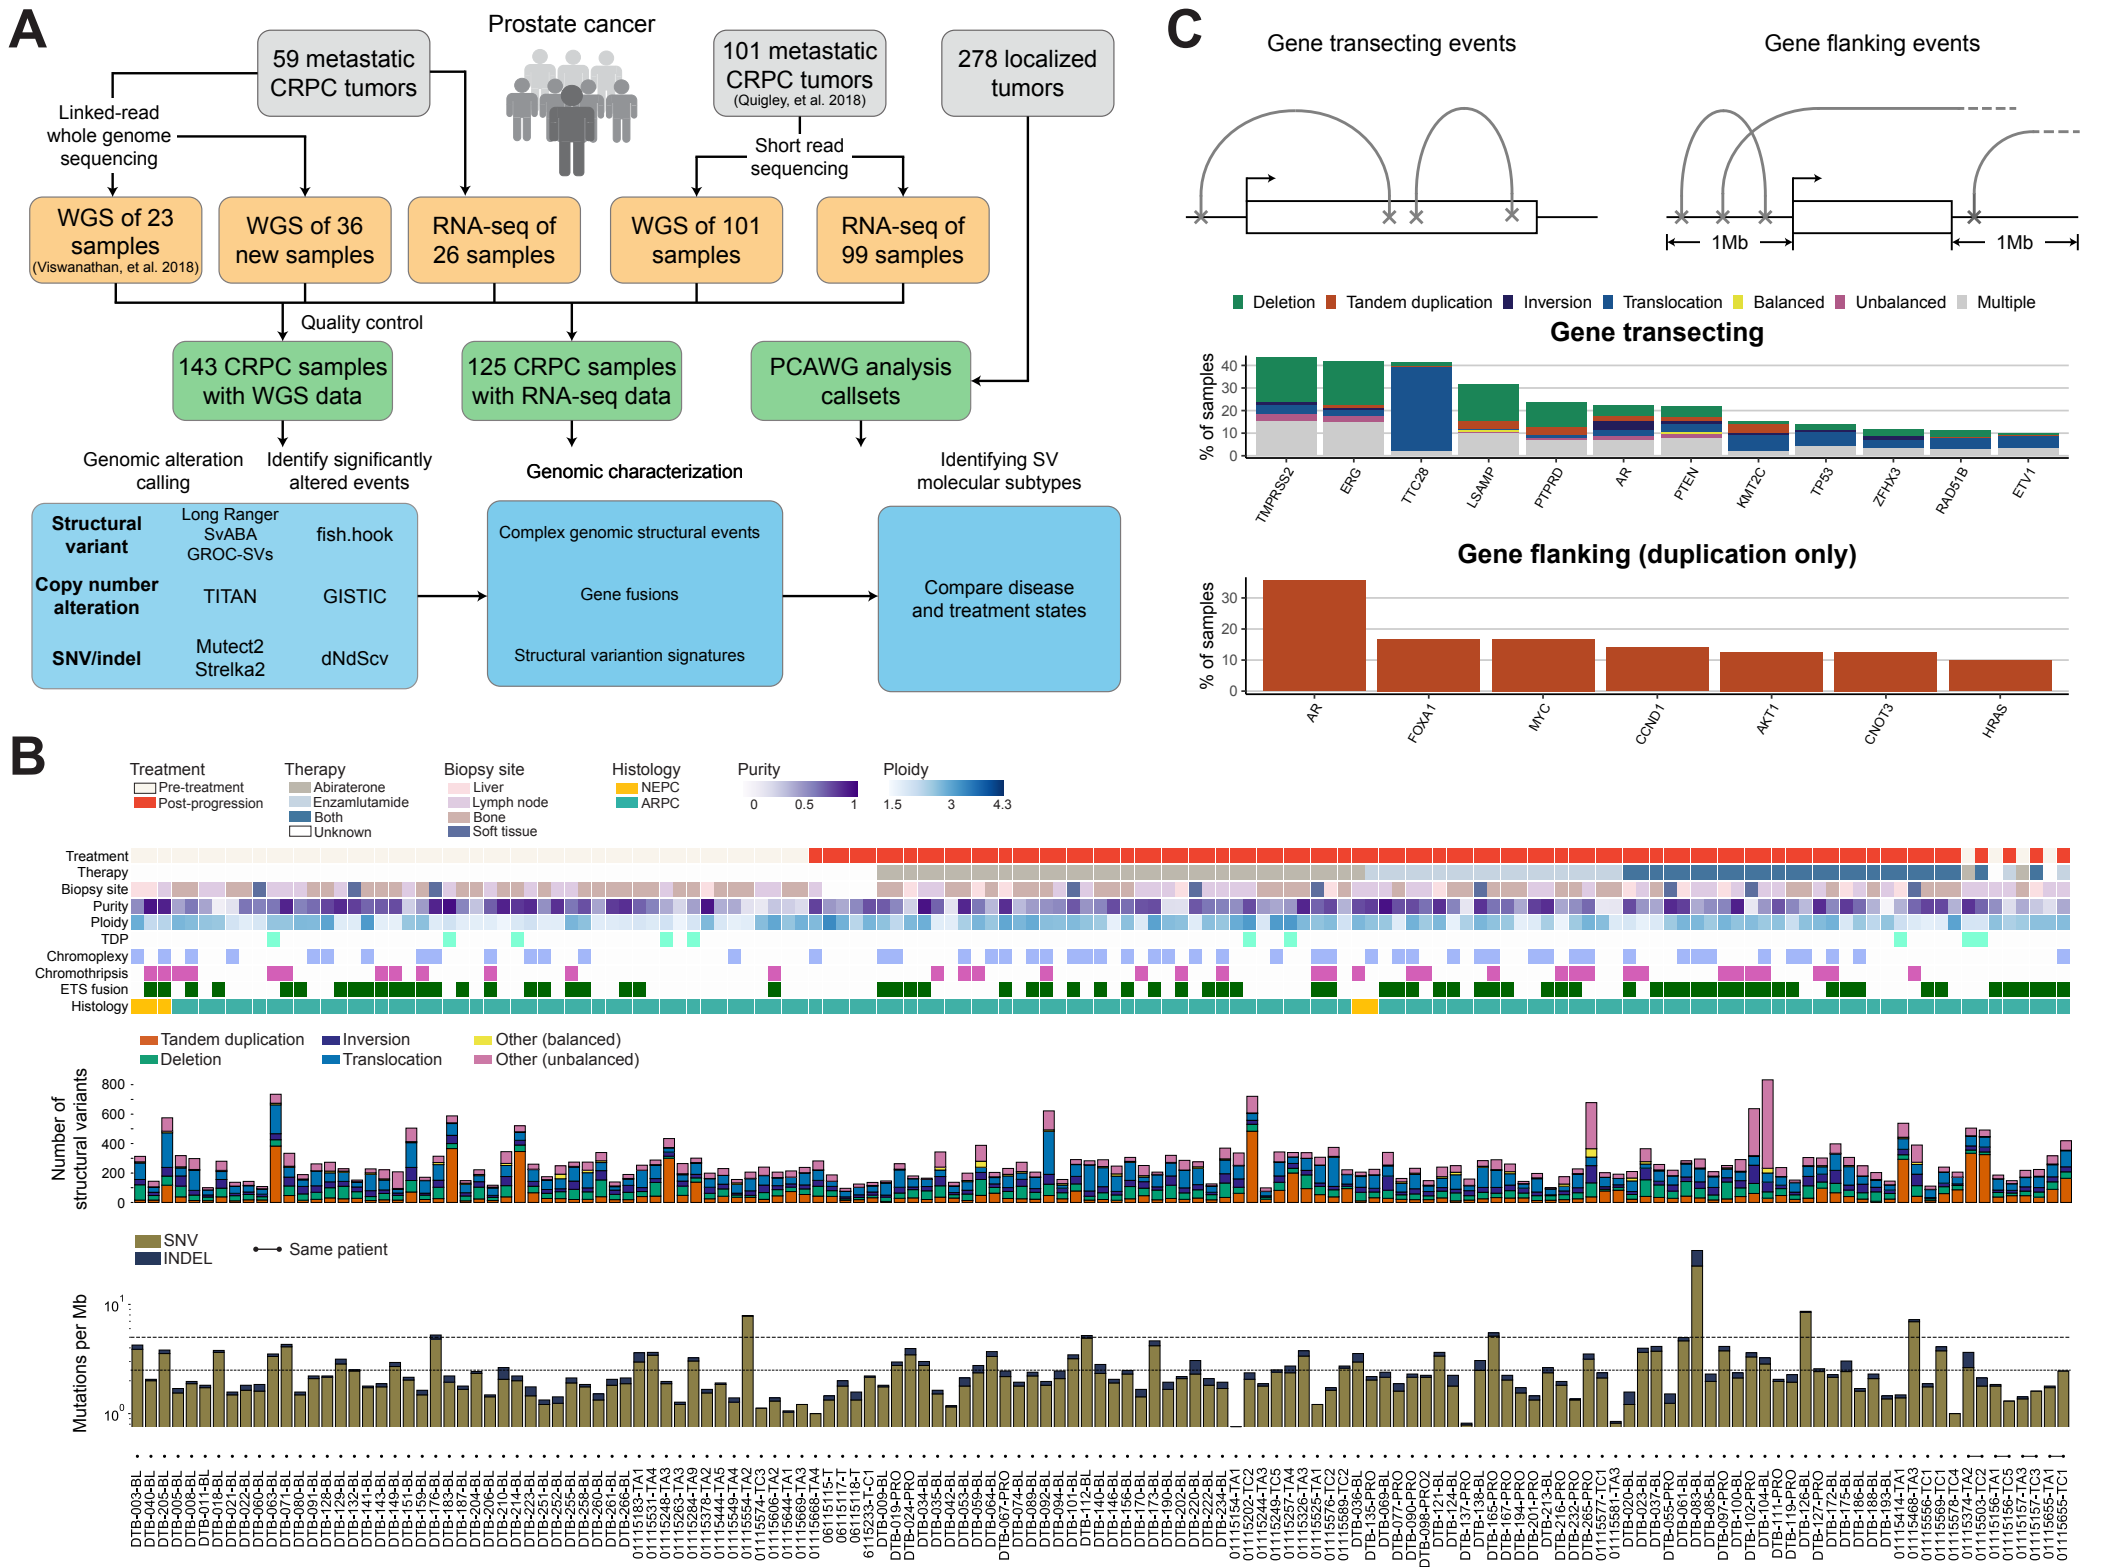

**Figure 1**

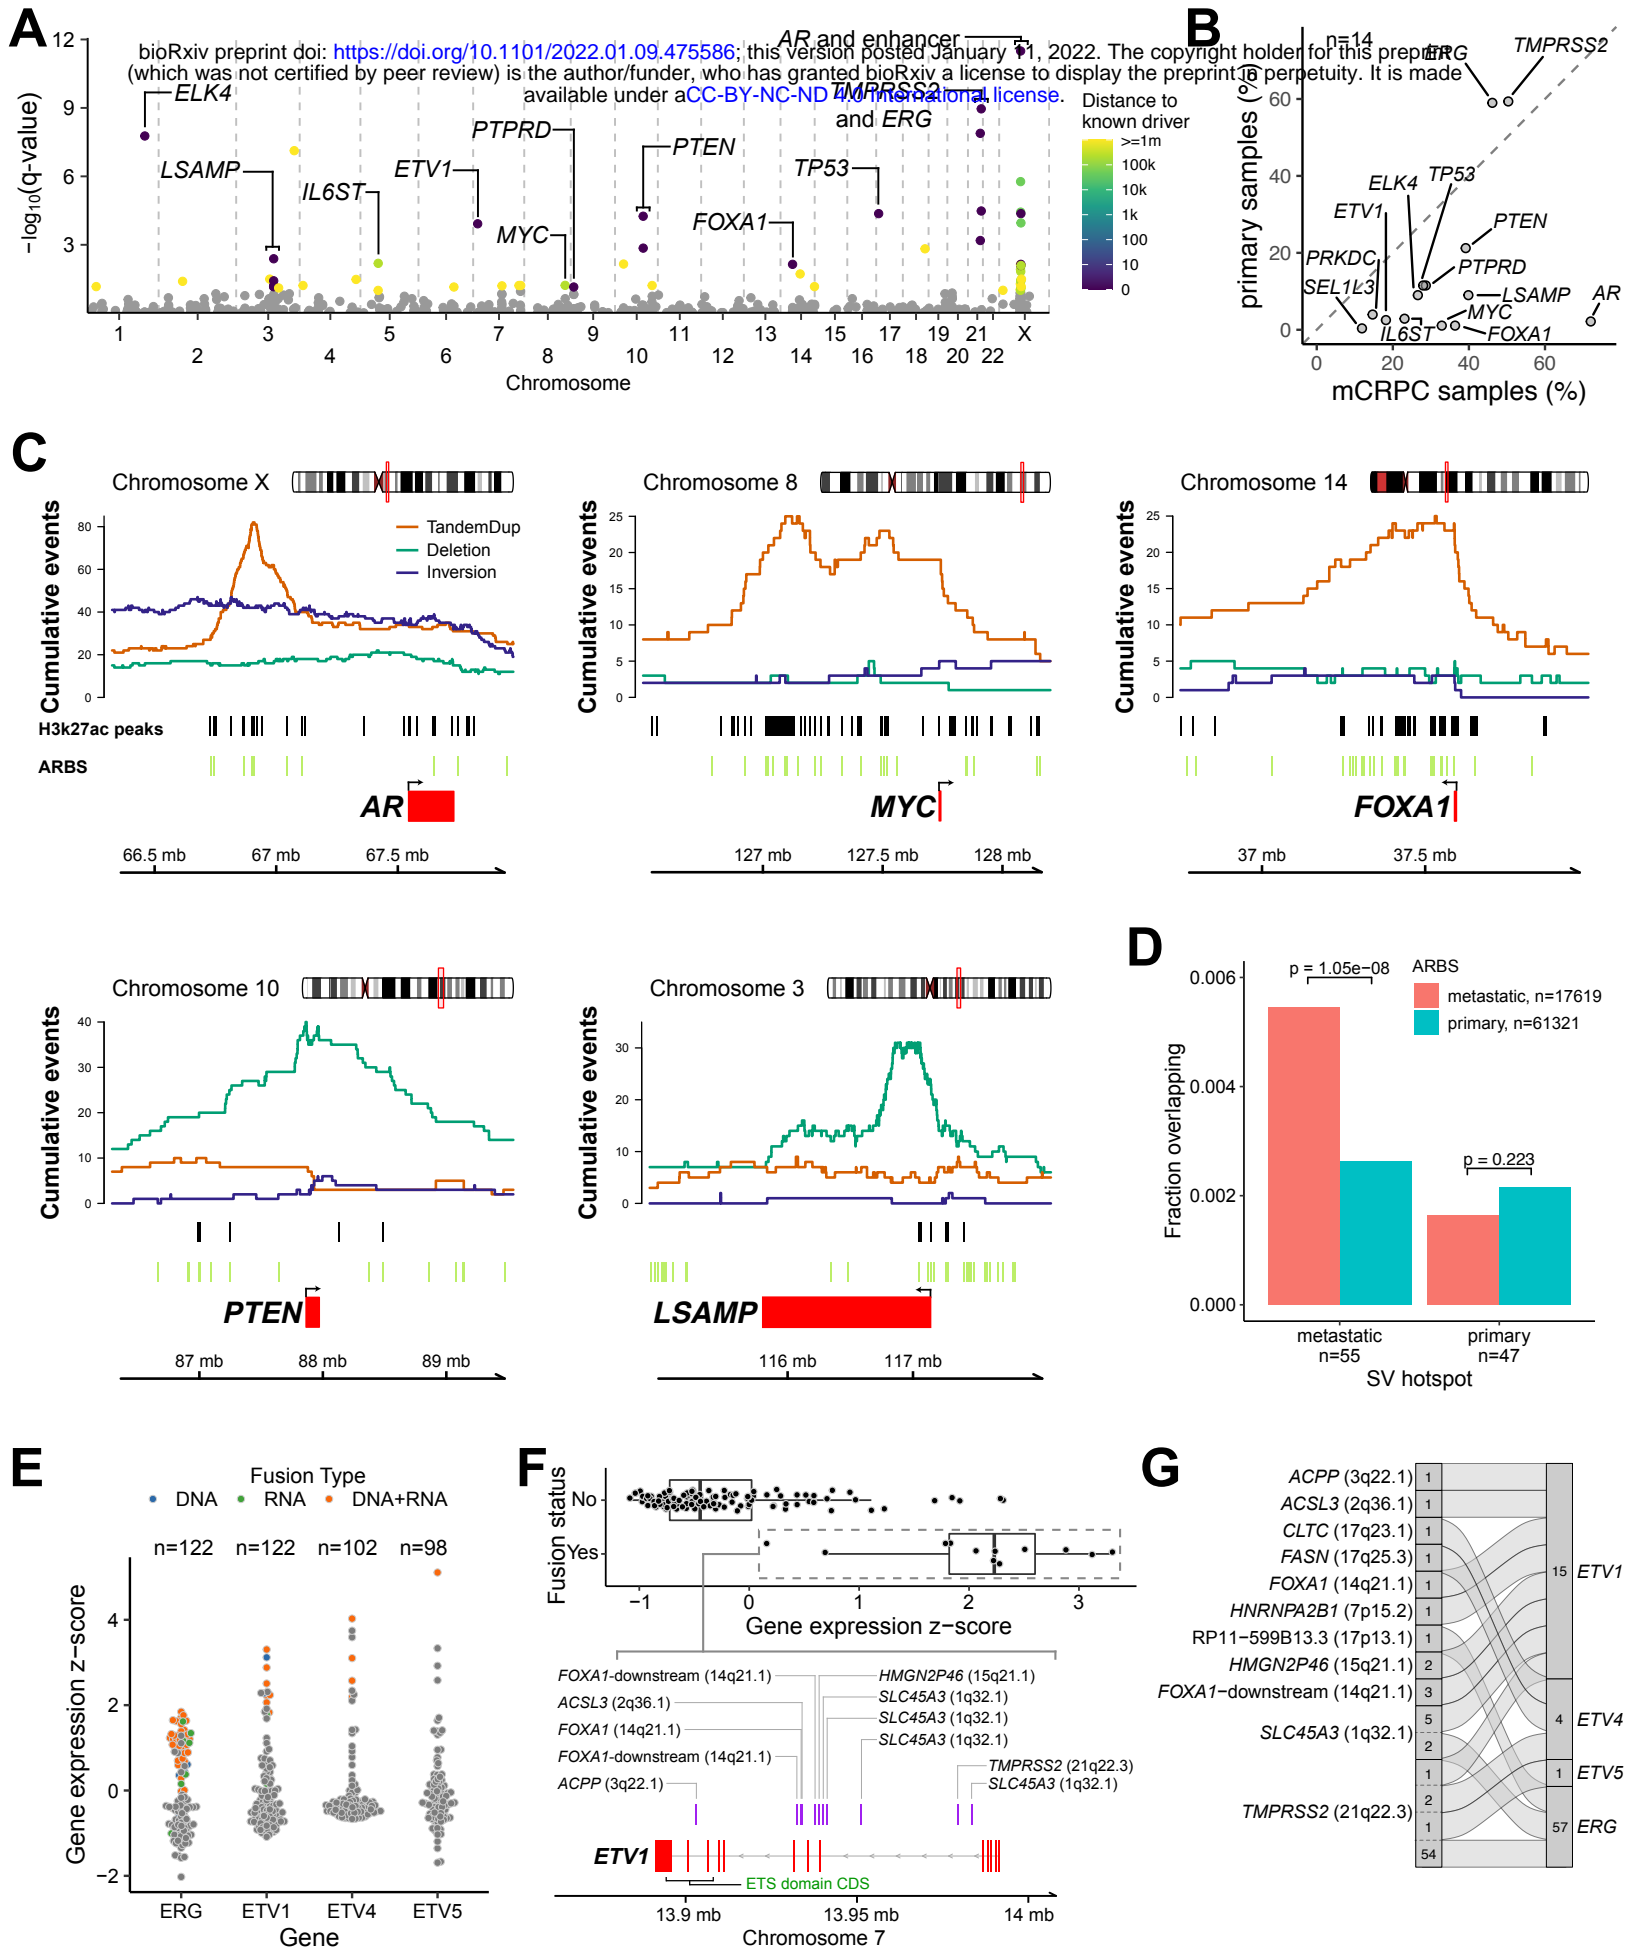

**Figure 2**

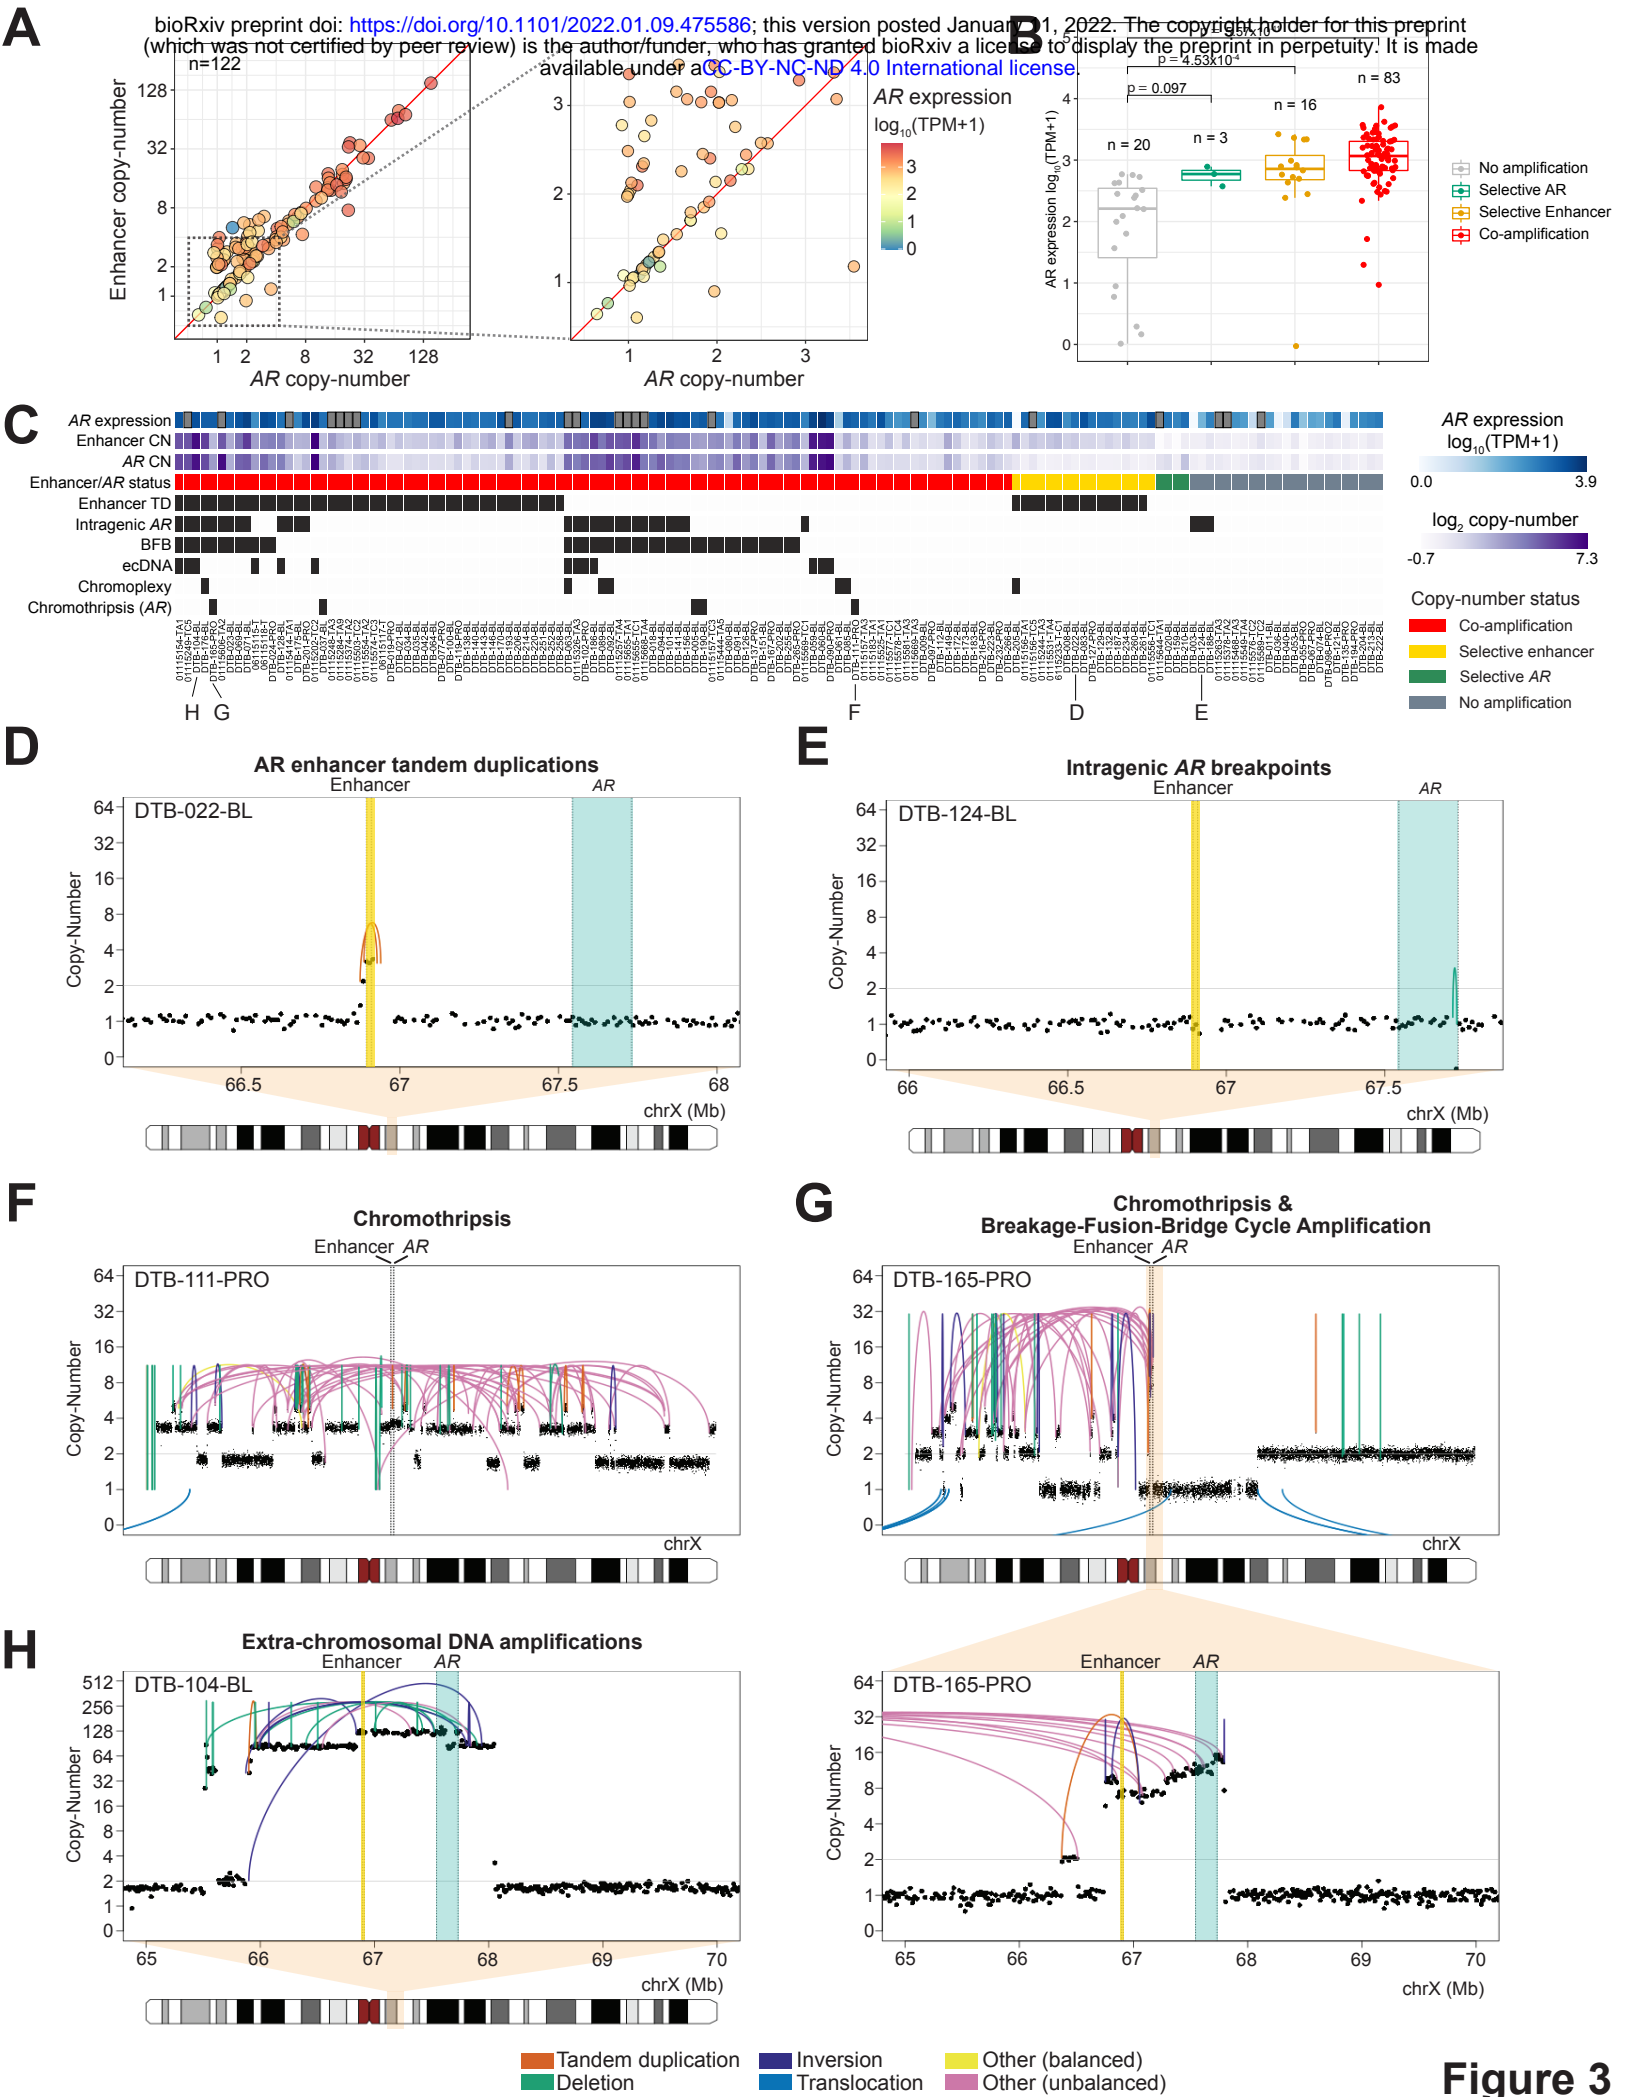

**Figure 3**
